# Supplementary material
Source: MDPI journal article supplement (https://www.mdpi.com/2813-0227/3/2/12)
Supplement: s1 [file s1]

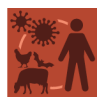

**Supplementary Information: Table S1.** Summary of 146 reviewed papers between 2000 and March 2020.

| Year | Title                                                                                                                                                                             | Location of Study                               | Study Design                                                | Sample Analysed                                          | Age           | Diagnostic Method                        | Disease/ Pathogen | Path ogen | Summary of Result                                                                                                                                                                                                                                | Quality/ Bias | Reference |
|------|-----------------------------------------------------------------------------------------------------------------------------------------------------------------------------------|-------------------------------------------------|-------------------------------------------------------------|----------------------------------------------------------|---------------|------------------------------------------|-------------------|-----------|--------------------------------------------------------------------------------------------------------------------------------------------------------------------------------------------------------------------------------------------------|---------------|-----------|
| 2020 | Molecular Detection of Rabies Lyssaviruses from Dogs in Southeastern Nigeria: Evidence of Transboundary Transmission of Rabies in West Africa                                     | South-eastern zone (Anambra, Ebonyi, and Enugu) | Random sampling (dog slaughter house for human consumption) | 278 dog brain tissue                                     | Not provided  | Direct Fluorescent Antibody Test, RT-PCR | Rabies lyssavirus | Virus     | Out of the 278 brain tissue specimens, 23 (8.3%) were positive for rabies lyssaviruses                                                                                                                                                           | Good          | [139]     |
| 2020 | Ectoparasitic infestations of cats and dogs in Izzi Local Government Area of Ebonyi State, Nigeria: brief communication for 'OneHealth' approach to control of potential zoonoses | Ebonyi state                                    | Systematic random sampling technique                        | 100 dogs/ 21 cats (combed out parasites/ skin scrapings) | Not provided  | Morphologically and microscopically      | Ectoparasite      | Parasite  | Out of the 100 dogs examined;<br>80 (80%)= <i>Rhipicephalus sanguineus</i> ,<br>8(8%)= <i>Haemaphysalis longicornis</i> ,<br>6(6%) = <i>Ctenocephalides canis</i> , 2 (2%)= <i>Ctenocephalides felis</i> and 4 (4%) = <i>Sarcoptes scabiei</i> . | Good          | [41]      |
| 2020 | Seroprevalence of Brucellosis                                                                                                                                                     | Benue state                                     | Not indicated                                               | 102 sera (51= male,                                      | 1 to 10 Years | Rose Bengal plate test                   | Brucellosis       | Bacteria  | total prevalence = 1.96% (Out of 102 dogs)                                                                                                                                                                                                       | Medium        | [140]     |

|      |                                                                                                                       |                                                                                 |                                                |                                                                     |                                          |                                                                                                                                       |                            |          |                                                                                                                                                                                                                                                                                                                                                                                       |        |       |
|------|-----------------------------------------------------------------------------------------------------------------------|---------------------------------------------------------------------------------|------------------------------------------------|---------------------------------------------------------------------|------------------------------------------|---------------------------------------------------------------------------------------------------------------------------------------|----------------------------|----------|---------------------------------------------------------------------------------------------------------------------------------------------------------------------------------------------------------------------------------------------------------------------------------------------------------------------------------------------------------------------------------------|--------|-------|
|      | cellosis in Nigerian Breed of Dog in North Bank Area of Makurdi, Benue State Nigeria                                  |                                                                                 |                                                | 51= female)                                                         |                                          | (RBPT) and Serum agglutination test (SAT)                                                                                             |                            |          |                                                                                                                                                                                                                                                                                                                                                                                       |        |       |
| 2020 | Prevalence of Intestinal Helminth Infections of Stray Dogs of Public Health Significance in Lagos Metropolis, Nigeria | Lagos                                                                           | Random sampling                                | 96 stool samples                                                    | Not provided                             | Microscopically for ova (centrifugation flotation method)                                                                             | Intestinal Helminth        | Parasite | The overall prevalence = 61.4% (59/96): <i>Ancylostoma caninum</i> = 62.5%, <i>Toxocara canis</i> = 20.8%, <i>Dipylidium caninum</i> = 18.7% and <i>Strongyloides stercoralis</i> = 2.0%.                                                                                                                                                                                             | Good   | [141] |
| 2019 | Ticks (Acari: Ixodidae) infesting dogs in Nigeria: epidemiological and public health implications                     | Bauchi, Benue, Borno, enugu, Kaduna, Kano, Ogun, Plateau, Taraba, Rivers states | Not indicated                                  | Ticks were collected from 608 owned dogs (males= 196, females= 412) | Adults (436) and puppies (172)           | Stereoscope (80-fold magnification) and a light microscope (100–200-fold magnification)/Taxonomic descriptions and morphological keys | ixodid ticks               | Parasite | 1196 ticks belonging to three genera were identified. <i>Rhipicephalus</i> (including the subgenus <i>Boophilus</i> ) ticks were collected from dogs = 95.2% of the ticks collected, <i>Haemaphysalis</i> (3.7%) and <i>Amblyomma</i> species (1.2%). The brown dog tick <i>Rhipicephalus sanguineus sensu lato</i> was the only tick identified in all the climatic zones of Nigeria | Medium | [142] |
| 2019 | Gastrointestinal parasites of dogs ( <i>Canis familiaris</i> ) in Maiduguri, Borno State, Northeastern                | Borno state                                                                     | A cross-sectional study (Convenience sampling) | 200 dogs' rectal fecal samples                                      | Young (<1 year) (71) and adult (>1 year) | saturated sodium chloride floatation technique/ Microscopy                                                                            | Gastrointestinal parasites | Parasite | The prevalence = 31.5% (63/200): <i>Ancylostoma</i> spp (16%), <i>Toxocara</i> spp (7.0%), <i>Dipylidium</i> spp (4.5%), <i>Isospora</i> spp (2.5%), and <i>Taenia</i> spp (1.5%),                                                                                                                                                                                                    | Good   | [143] |

|      |                                                                                                              |               |                 |                                                                                              |                                                                                     |                                |                                     |          |                                                                                                                                                                                                                                                             |        |       |
|------|--------------------------------------------------------------------------------------------------------------|---------------|-----------------|----------------------------------------------------------------------------------------------|-------------------------------------------------------------------------------------|--------------------------------|-------------------------------------|----------|-------------------------------------------------------------------------------------------------------------------------------------------------------------------------------------------------------------------------------------------------------------|--------|-------|
|      | Nigeria: Risk factors and zoonotic implications for human health                                             | (129)         |                 |                                                                                              |                                                                                     |                                |                                     |          |                                                                                                                                                                                                                                                             |        |       |
| 2019 | Identification of <i>Trypanosoma brucei gambiense</i> in naturally infected dogs in Nigeria                  | Enugu state   | Not indicated   | Blood samples were collected on FTA cards from 19 dogs                                       | 6 months to 7 years                                                                 | Subspecies-specific PCR tests  | <i>Trypanosoma brucei gambiense</i> | Parasite | generic PCR test = subgenus Trypanozoon , Specific PCR test = <i>T. b. gambiense</i> .(in 2 dogs)                                                                                                                                                           | Good   | [144] |
| 2019 | Epizootiology of zoonotic parasites of dogs in Abua area of Rivers State, Nigeria                            | Rivers state  | Random sampling | 400 stool samples                                                                            | 0-6 months , 7-12 months , 2-3 years, 4-6 years, ≥7 years                           | Formol-ether concentration     | Parasites                           | Parasite | 260 (65%) positive for parasites: <i>Ancylostoma caninum</i> , <i>Strongyloides stercoralis</i> , <i>Diphylidium caninum</i> , <i>Toxocara canis</i> , <i>Spirocerca lupi</i> , <i>Baylisascaris procyonis</i> , <i>Taenia</i> spp and <i>Trichuris</i> spp | Good   | [145] |
| 2019 | Prevalence of Parasites among Dogs Undergoing Treatment at Polo Veterinary Clinic Jos, North Central Nigeria | Plateau state | Not indicated   | 639 dogs (blood and stool samples), physical examination and direct picking of ectoparasites | young (1-6 months old), adolescent (7 months – 1 year) and adult (1 year and above) | Microscopy/blood fim/wet mount | Parasites                           | Parasite | Infected= 82 (12.8%)<br>Uninfected = 557 (87.2%).<br>protozoans (canine babesiosis, piroplasmosis), Helminthes and arthropod groups.<br>co-infections in some dogs                                                                                          | Medium | [146] |
| 2019 | Detection of                                                                                                 | Taraba        | Simple          | 150 dogs                                                                                     | 136                                                                                 | direct fluo-                   | Rabies                              | Ra-      | 3 out of the 150 (2%) posi-                                                                                                                                                                                                                                 | Good   | [147] |

|      |                                                                                                                                  |                                                          |                        |                                                                  |                                           |                                                                               |                             |           |                                                                                                                                                                                                                                  |        |       |
|------|----------------------------------------------------------------------------------------------------------------------------------|----------------------------------------------------------|------------------------|------------------------------------------------------------------|-------------------------------------------|-------------------------------------------------------------------------------|-----------------------------|-----------|----------------------------------------------------------------------------------------------------------------------------------------------------------------------------------------------------------------------------------|--------|-------|
|      | rabies virus antigen in brain tissue of dogs slaughtered for human consumption in Taraba State, Nigeria                          | state                                                    | random sampling        | brain tissue (consisting of 82 males and 68 females)             | adults and 14 puppies                     | rescent anti-body test (DFAT)                                                 |                             | bies      | tive                                                                                                                                                                                                                             |        |       |
| 2019 | Molecular detection of filarioid worms in dogs in Nigeria, West Africa                                                           | Akwa Ibom, Delta, Kaduna, Kwara, Plateau, Oyo and Rivers | Not indicated          | 197 blood samples (74 males, 108 females, 15 no sex information) | 0 to >36 months                           | High Resolution Melt Real Time PCR and sequencing                             | Filarioid worms             | Para-site | one (0.5%) was positive; 94% similar to <i>Acanthocheilonema reconditum</i>                                                                                                                                                      | Medium | [148] |
| 2019 | Occurrence of Gastrointestinal Parasitic Associated with Exotic Dogs in Commercial Breeding Mills in Jos Metropolis-Nigeria      | Plateau state                                            | cross-sectional study  | 150 fecal samples (68 males, 82 females)                         | 0-3, 4-7, 8-11, 12-15 and > 16-months-old | formol ether and floatation concentration techniques                          | Parasites                   | Para-site | <i>Ancylostoma caninum</i> (28.0%)<br><i>Dipylidium caninum</i> (23.3%), <i>Toxocara canis</i> (14.0%), <i>Trichuris vulpis</i> (11.3%), <i>Taenia</i> sp. (5.33%)<br><i>Giardia</i> sp. (7.33%) and <i>Coccidia</i> sp. (5.33%) | Good   | [149] |
| 2019 | Prevalence and risk factors associated with <i>Cryptosporidium</i> spp. infection in local breed of dogs in Enugu State, Nigeria | Enugu state                                              | Simple random sampling | 203 fresh fecal samples                                          | Not provided                              | formol ether sedimentation method and modified Ziehl–Neelsen light microscopy | <i>Cryptosporidium</i> spp. | Para-site | 74 (36.5%) dogs were infected with <i>Cryptosporidium</i> spp. oocysts                                                                                                                                                           | Good   | [150] |

|      |                                                                                                                        |                   |                       |                                                                                                                                       |                                     |                                                           |                             |          |                                                                                                                                                                                                                                                                                                                                                                                                                                                                                                                                                                                                                                                                                                               |        |       |
|------|------------------------------------------------------------------------------------------------------------------------|-------------------|-----------------------|---------------------------------------------------------------------------------------------------------------------------------------|-------------------------------------|-----------------------------------------------------------|-----------------------------|----------|---------------------------------------------------------------------------------------------------------------------------------------------------------------------------------------------------------------------------------------------------------------------------------------------------------------------------------------------------------------------------------------------------------------------------------------------------------------------------------------------------------------------------------------------------------------------------------------------------------------------------------------------------------------------------------------------------------------|--------|-------|
| 2019 | Prevalence of single and mixed parasitic infections of dogs in Egbeda communities, Ibadan, Oyo State, Nigeria          | Ibadan, Oyo state | cross-sectional study | 292 dogs and 241 dog owners were examined for parasites. Ectoparasites were collected from dog fur, stools from dogs and their owners | 0-6, 6-12, >12 months               | Microscopically and modified sucrose floatation technique | Intestinal parasites        | Parasite | Ectoparasites were present on 199 (68.2%) dogs, while 239 (81.8%) had intestinal parasites. 6 ectoparasite species; <i>Ctenocephalides canis</i> (5.5%), <i>C. felis</i> (39.7%), <i>Rhipicephalus sanguineus</i> (51.3%), <i>Haemaphysalis leachii</i> (48.9), <i>Trichodectes canis</i> (2.1%) and <i>Linognathus</i> spp (1.7%). <i>Ascaris lumbricoides</i> , <i>Ancylostoma</i> spp and <i>Trichuris</i> spp were identified in 99 (41.1%) of the dog owner. Gastrointestinal parasites identified in dogs were <i>Toxocara canis</i> (55.8%), <i>Ascaris</i> spp (36%), <i>Ancylostoma</i> spp (40.1%), <i>Trichuris</i> spp (7.5%), <i>Isospora</i> spp (14.4%) and <i>Toxascaris leonina</i> (15.1%). | Good   | [82]  |
| 2019 | Prevalence of Campylobacter Species in Dogs in Bassa, Plateau State, Nigeria                                           | Plateau state     | Not indicated         | 105 fecal samples (male =45, female= 60)                                                                                              | <1 year (77), >1 year (28)          | Microbiological technique                                 | Campylobacter Species       | Bacteria | 15(14.3%) positive for <i>Campylobacter</i> species                                                                                                                                                                                                                                                                                                                                                                                                                                                                                                                                                                                                                                                           | Medium | [151] |
| 2019 | Prevalence of Zoonotic Gastrointestinal Helminth Parasites (ZGIHP) of Dogs Presented to the Small Animal Clinic of the | Benue state       | NA                    | 97 fecal samples                                                                                                                      | 0-11 months, 1-4 years and >4 years | Microscopically and simple floatation technique           | Gastrointestinal helminthes | parasite | Overall prevalence =32 (32.99%)<br>Single infection= 28(87.5%), mixed infections = 4(12.5%). The Helminth = <i>Ancylostoma caninum</i> 30(30.93%) and <i>Dipylidium caninum</i> 6 (6.12%). local breed= 43.18%, Cross breed=16.67%                                                                                                                                                                                                                                                                                                                                                                                                                                                                            | Medium | [69]  |

|      |                                                                                                                     |             |                       |                                                                                                                                 |                                        |                                                                                                     |               |          |                                                                                                                                                                                                                                                                                                                                   |        |       |
|------|---------------------------------------------------------------------------------------------------------------------|-------------|-----------------------|---------------------------------------------------------------------------------------------------------------------------------|----------------------------------------|-----------------------------------------------------------------------------------------------------|---------------|----------|-----------------------------------------------------------------------------------------------------------------------------------------------------------------------------------------------------------------------------------------------------------------------------------------------------------------------------------|--------|-------|
|      | Veterinary Teaching Hospital, University of Agriculture, Makurdi, Benue State (October 2016-January 2017)           |             |                       |                                                                                                                                 |                                        |                                                                                                     |               |          | Exotic breed =25.53%.                                                                                                                                                                                                                                                                                                             |        |       |
| 2019 | Seasonal distribution and common management practices of ectoparasites of domestic dogs in Ilorin, Nigeria          | Kwara state | cross sectional study | 334 dogs. Ticks were removed using forceps. Fleas and lice removed by combing out hair. 164(48.9 %) male and 170(51.1 %) female | 0-6 months, 7-11 months and ≥12 months | parasitological method                                                                              | Ectoparasites | parasite | Overall prevalence= 52.0 % ticks :<br><i>Rhipicephalus sanguineus</i> =70.3 %, <i>Haemaphysalis leachi</i> = 29.4 % and <i>Amblyomma variegatum</i> = 4.5 %),<br>Flea ( <i>Ctenocephalides canis</i> , 63.7 %) and lice ( <i>Heterodoxus spiniger</i> , 30.0 %)<br>Seasonal distribution = more in the rainy season than the dry. | Good   | [152] |
| 2019 | Serological and molecular surveillance for influenza A virus in dogs and their human contacts in Oyo State, Nigeria | Oyo state   | not indicated         | 239 blood and nasal swabs from dogs (118 males, 121 females) and 39 human nasal swabs were used for this study                  | NA                                     | Enzyme-linked immunosorbent assay (ELISA)/ Reverse transcriptase-Polymerase chain reaction (RT-PCR) | Influenza A   | Virus    | Serology; 4(1.7%) positive for IAV by ELISA.<br>1 (25.0%) of the 4 ELISA-positive sera was positive by HI for the Influenza virus H3N8 subtype with a titer of 1:128. All the nasal swabs were assayed for Influenza A virus RNA by RT-PCR were negative.                                                                         | Medium | [153] |
| 2019 | The sero-prevalence of                                                                                              | Oyo state   | Random sampling       | blood from 384 dogs                                                                                                             | 0-3 months                             | ELISA (sera) and Micros-                                                                            | Scabies       | parasite | The prevalence = 67.45% (259/384) using the ELISA                                                                                                                                                                                                                                                                                 | Good   | [154] |

|      |                                                                                                                                        |                                            |               |                                                                                     |                                   |                                                                                                  |                              |          |                                                                                                                                                                                                                                                                                                   |        |       |
|------|----------------------------------------------------------------------------------------------------------------------------------------|--------------------------------------------|---------------|-------------------------------------------------------------------------------------|-----------------------------------|--------------------------------------------------------------------------------------------------|------------------------------|----------|---------------------------------------------------------------------------------------------------------------------------------------------------------------------------------------------------------------------------------------------------------------------------------------------------|--------|-------|
|      | <i>Sarcoptes scabiei</i> var. <i>canis</i> and its associated risk factors in dogs in Ibadan, South-west Nigeria                       |                                            |               | (149 males and 235 females)/ 56 skin scrapies from 56 dogs selected out of 384 dogs | , 4-6, 7-12, >12 months           | copy (skin scrapies)                                                                             |                              |          | kit. The prevalence of skin scrapping with microscopy = mites in 12 out of 56 dogs                                                                                                                                                                                                                |        |       |
| 2019 | <i>Clostridium difficile</i> shedding by healthy dogs in Nigeria and Malawi                                                            | Nigeria (FCT, Abuja) and Malawi (Blantyre) | Not indicated | 120 (Nigeria)/ 92 (Malawi) dog fecal samples                                        | Not provided                      | Culture/ PCR/ Ribotyping                                                                         | <i>Clostridium difficile</i> | Bacteria | Nigeria= 31/120 (26%)<br>Overall, 22/42 (52%) isolates were toxigenic; 17/31 (55%) were from Nigeria<br>All toxigenic isolates possessing <i>tcdA</i> and <i>tcdB</i> , and only one also possessed <i>cdtA/B</i> . Sixteen different ribotypes were found, ten (63%) of which were non-toxigenic | Medium | [40]  |
| 2019 | Serological and Parasitological Survey of Canine <i>Dirofilaria immitis</i> Infection in Maiduguri, Borno state, North-Eastern Nigeria | Borno state                                | Not indicated | 250 blood samples (135 males and 115 females)                                       | young (<1 year), adult (>1 years) | parasitological (Buffy coat, wet mount, modified Knott's test) and serological (ELISA) technique | <i>Dirofilaria immitis</i>   | parasite | 12(4.8%) positive<br>Young= 2(0.8%),<br>Adult= 10(4.0%)                                                                                                                                                                                                                                           | Medium | [155] |
| 2018 | Genotypic characterization of <i>Cryptosporidium</i> species in humans and peri-domestic                                               | Ekiti and Oyo states                       | Not indicated | 187 (humans= 120, animals= 67) fecal samples (only 1 from dog)                      | not provided                      | PCR                                                                                              | <i>Cryptosporidium</i> spp   | parasite | 16 of 187 = <i>Cryptosporidium</i> 18S PCR positive.<br>5 samples originating from HIV-positive patients, 5 from otherwise healthy children, 2 from chickens, 3 from goats, and 1 from a dog were positive for at                                                                                 | Medium | [156] |

|      |                                                                                                                                                                          |             |                 |                                                                                                                                                     |                       |                                                   |                                                            |           |                                                                                                                                                                                                                                                                                                                                                                                                                                                         |        |       |
|------|--------------------------------------------------------------------------------------------------------------------------------------------------------------------------|-------------|-----------------|-----------------------------------------------------------------------------------------------------------------------------------------------------|-----------------------|---------------------------------------------------|------------------------------------------------------------|-----------|---------------------------------------------------------------------------------------------------------------------------------------------------------------------------------------------------------------------------------------------------------------------------------------------------------------------------------------------------------------------------------------------------------------------------------------------------------|--------|-------|
|      | animals in Ekiti and Oyo States, Nigeria                                                                                                                                 |             |                 |                                                                                                                                                     |                       |                                                   |                                                            |           | least 1 marker. The only dog sampled was positive for <i>Cryptosporidium canis</i>                                                                                                                                                                                                                                                                                                                                                                      |        |       |
| 2018 | Prevalence of ectoparasite infestations in owned dogs in Kwara State, Nigeria                                                                                            | Kwara state | Random sampling | 333 dogs were screened, ectoparasites combed out                                                                                                    | 0-6, 7-11, ≥12 months | Microscopy                                        | Ectoparasites                                              | para-site | 271 (81.4%) dogs were infested with at least one species of ectoparasite: ticks ( <i>Rhipicephalus sanguineus sensu lato</i> , <i>Haemaphysalis leachii</i> and <i>Amblyomma variegatum</i> ), fleas ( <i>Ctenocephalides canis</i> and <i>C. felis</i> ) Louse ( <i>Heterodoxus spiniger</i> ). <i>R. sanguineus</i> was the most prevalent (70.3%) followed by <i>C. felis</i> (42.1%) and <i>H. spiniger</i> (30.0%). Multiple infestations recorded | Good   | [157] |
| 2018 | Antimicrobial usage and presence of extended-spectrum β-lactamase-producing Enterobacteriaceae in animal rearing households of selected rural and peri-urban communities | Ogun state  | Not indicated   | 457 samples from animal and environmental sources within the households: Chickens= 41.6%, goats = 35.3%, <b>dogs (108; 33.8%)</b> and sheep = 14.4% | Not provided          | Culture/ commercial biochemical kit /MALDI-TOF MS | extended-spectrum β-lactamase-producing Enterobacteriaceae | Bacteria  | Overall, the prevalence of ESBL-producing Enterobacteriaceae= 53 (11.6%): <i>Escherichia coli</i> (n = 49) and <i>Klebsiella pneumoniae</i> (n = 4). All ESBL-producing isolates demonstrated multidrug resistance to at least 3 different classes of antimicrobials.                                                                                                                                                                                   | Medium | [158] |
| 2018 | Detection and identification                                                                                                                                             | Oyo state   | Not indicated   | 116 dogs (male= 46,                                                                                                                                 | 2 days–16             | Light Microscopy and                              | blood-borne infections                                     | Parasite  | LM overall prevalence = 14.7% (17/116); <i>Babesia canis</i>                                                                                                                                                                                                                                                                                                                                                                                            | Medium | [159] |



|      |                                                                                                                             |               |               |                   |                                           |                                      |                 |          |                                                                                                                                                                                                                                                                                                                                                                                                                                                                                                                                                                                                                                                                                                                                                                |        |       |  |
|------|-----------------------------------------------------------------------------------------------------------------------------|---------------|---------------|-------------------|-------------------------------------------|--------------------------------------|-----------------|----------|----------------------------------------------------------------------------------------------------------------------------------------------------------------------------------------------------------------------------------------------------------------------------------------------------------------------------------------------------------------------------------------------------------------------------------------------------------------------------------------------------------------------------------------------------------------------------------------------------------------------------------------------------------------------------------------------------------------------------------------------------------------|--------|-------|--|
|      | cation of blood-borne infections in dogs in Nigeria using light microscopy and the polymerase chain reaction                |               | female= 67)   | -years            | broad-spectrum rRNA gene PCR-based assays |                                      |                 |          | (3.5%), <i>Ehrlichia canis</i> (10.3%) and <i>Trypanosoma congolense</i> (0.9%)<br>Single coinfection with <i>Babesia canis</i> and <i>Ehrlichia canis</i> (0.9%).<br>PCR analysis = 89/116 (76.7%). multiple Infections occurred.<br>Specifically, among the 89 PCR positive samples; <i>Babesia</i> spp.= 85.4%, <i>Ehrlichia</i> spp.= 46.1% and <i>hemoplasmas</i> (13.5%). Sequencing identified 1.7% that contained <i>Hepatozoon canis</i> DNA. Sequencing of hemoplasma positive samples identified 'Candidatus <i>Mycoplasma haemobos</i> ' in 0.8% of dogs. Using PCR, a 5-fold higher prevalence of blood-borne infections was found in the dogs (76.7%, 89/116) than with LM (14.7%, 17/116) alone. A total of 57.3% of infected dogs were anaemic |        |       |  |
| 2018 | Detection of Antibodies to Non-Vaccinal <i>Leptospira</i> Serovars in Dogs in Jos North and Jos South Local Government Area | Plateau state | not indicated | 200 blood samples | 1 to 7 months                             | Microscopic Agglutination Test (MAT) | Leptospirosis   | Bacteria | Total prevalence = 129 dogs                                                                                                                                                                                                                                                                                                                                                                                                                                                                                                                                                                                                                                                                                                                                    | Medium | [160] |  |
| 2018 | Survey for                                                                                                                  | Gombe         | Cross         | 347 dog           | Adult/                                    | Rose Bengal                          | <i>Brucella</i> | Bac-     | The sero-prevalence =                                                                                                                                                                                                                                                                                                                                                                                                                                                                                                                                                                                                                                                                                                                                          | Good   | [161] |  |

|      |                                                                                                                                      |                   |                 |                                                                               |              |                                                                                 |                                                 |          |                                                                                                                                                                                                                                                                                       |        |       |
|------|--------------------------------------------------------------------------------------------------------------------------------------|-------------------|-----------------|-------------------------------------------------------------------------------|--------------|---------------------------------------------------------------------------------|-------------------------------------------------|----------|---------------------------------------------------------------------------------------------------------------------------------------------------------------------------------------------------------------------------------------------------------------------------------------|--------|-------|
|      | <i>Brucella</i> antibodies in dogs in billiri local government area of Gombe state, Nigeria.                                         | state             | sectional study | sera (male= 218, female= 129)                                                 | puppy        | Plate Test (RBPT) and competitive Enzyme Linked Immuno Sorbent Assay (c-ELISA). | antibodies                                      | teria    | RBPT (21.90%) and by c-ELISA (14.70%).                                                                                                                                                                                                                                                |        |       |
| 2018 | Haemoparasite fauna of domestic animals in Plateau State, North Central Nigeria                                                      | Plateau state     | not indicated   | 1298 blood samples (501 cattle; 252 sheep; 393 goats; 129 dogs and 23 horses) | Not provided | Giemsa stained thin blood film                                                  | Haemoparasites                                  | Parasite | <i>Babesia canis</i> prevalence= 23.26 %, <i>Hepatozoon canis</i> prevalence= 13.18%                                                                                                                                                                                                  | Medium | [162] |
| 2018 | Microbial association with suspected cutaneous leishmaniasis (cl) lesions on dogs in jos-south Plateau State North-central , Nigeria | Plateau state     | not indicated   | 72 wound swab samples and lesion scrapings                                    | Not provided | Giemsa stained technique, Micro-bacteriological and Mycological technique       | Leishmania amastigotes and Other Microorganisms | Parasite | <i>Staphylococcus</i> spp, <i>Streptococcus</i> spp, <i>Bacillus</i> spp, <i>Enterobacter</i> spp, <i>Serratia</i> spp, <i>Alkaligenes</i> spp, <i>Aspergillus</i> spp, <i>Microsporum</i> spp, <i>Trychophyton</i> spp, <i>Penicillium</i> spp, <i>Candida</i> spp, <i>Mucor</i> spp | Medium | [163] |
| 2018 | Molecular characterization of a rabies virus isolated from trade dogs in Plateau State, Nigeria                                      | Plateau state     | not indicated   | 532 brain samples                                                             | Not provided | Direct fluorescence antibody assay (DFAT)                                       | Rabies                                          | Virus    | 92 out of 532 (17.3%)                                                                                                                                                                                                                                                                 | Medium | [164] |
| 2018 | Molecular detection of                                                                                                               | Ibadan, Oyo state | Random sampling | 203 fecal samples                                                             | Not provided | Polymerase chain reac-                                                          | <i>Cryptosporidium</i> spp                      | Parasite | 2.5% (5/203); <i>C. parvum</i> subtype Iic and <i>C. muris</i>                                                                                                                                                                                                                        | Good   | [165] |

| Prevalence of Cryptosporidium species in street-sampled dog faeces in Ibadan, Nigeria |                                                                                      |               |                      |                                                                           |                                             |                                                               |                                            |          |                                                                                                                                                                                                                                                                                                                                                                                                           |
|---------------------------------------------------------------------------------------|--------------------------------------------------------------------------------------|---------------|----------------------|---------------------------------------------------------------------------|---------------------------------------------|---------------------------------------------------------------|--------------------------------------------|----------|-----------------------------------------------------------------------------------------------------------------------------------------------------------------------------------------------------------------------------------------------------------------------------------------------------------------------------------------------------------------------------------------------------------|
| Year                                                                                  | Study Title                                                                          | Location      | Sampling Method      | Sample Size                                                               | Age Group                                   | Diagnostic Method                                             | Sample Type                                | Parasite | Prevalence                                                                                                                                                                                                                                                                                                                                                                                                |
| 2018                                                                                  | Prevalence of gastrointestinal and haemo-parasites in hunting dogs in Zaria, Nigeria | Kaduna state  | Convenience sampling | 61 Blood and faecal samples (males =39 and females =22)                   | <1-year-old, 1-3 year-old, and >3-year-old, | Giemsa stained thin blood smear and simple flotation methods. | haemo- and gastrointestinal (GI) parasites | Parasite | <p><i>Babesia canis</i> (16.3%) <i>Ehrlichia canis</i> (1.64%), <i>Dirofilaria immitis</i> (1.64%) and mixed infections (1.64%) were identified. 19 dogs (31.5%) were infected with GI parasites including; <i>Taenia</i> spp (19.67%), <i>Toxocara canis</i> (8.20%), <i>Isospora</i> spp (1.64%), <i>Dipylidium caninum</i> (1.64%), <i>Ancylostoma caninum</i> (1.64%) and mixed infection (1.64%)</p> |
| 2018                                                                                  | Prevalence of ectoparasite infestations in owned dogs in Kwara State, Nigeria        | Kwara state   | Random sampling      | 333 (48.9% males and 51.1% females) combed out parasites/ skin scrappings | 0-6 months, 7-11 months and ≥12 months      | Microscopically                                               | Ectoparasite                               | Parasite | <p>Overall prevalence=81.4%t ; ticks (<i>Rhipicephalus sanguineus sensu lato</i>, <i>Haemaphysalis leachii</i> and <i>Amblyomma variegatum</i>), fleas (<i>Ctenocephalides canis</i> and <i>C. felis</i>) louse (<i>Heterodoxus spiniger</i>). <i>R. sanguineus</i> (70.3%), <i>C. felis</i> (42.1%) and <i>H. spiniger</i> (30.0%)</p>                                                                   |
| 2018                                                                                  | Prevalence Study of Gastrointestinal Helminth in Domestic                            | Plateau state | Random sampling      | 228 fecal samples                                                         | NA                                          | post-mortem differential parasite count                       | Gastrointestinal Helminth                  | Parasite | <p>Overall prevalence= 138 (60.53%): Cestodes =<i>Taenia pisiformis</i> (36.84%), <i>Dipylidium caninum</i> (12.72%) and <i>Echinococcus granulosus</i> (1.75%).</p>                                                                                                                                                                                                                                      |

|      |                                                                                                                                                  |             |               |                                                                    |                                                |                                      |                           |          |                                                                                                                                                                                                   |        |       |
|------|--------------------------------------------------------------------------------------------------------------------------------------------------|-------------|---------------|--------------------------------------------------------------------|------------------------------------------------|--------------------------------------|---------------------------|----------|---------------------------------------------------------------------------------------------------------------------------------------------------------------------------------------------------|--------|-------|
|      | Dogs ( <i>Canis familiaris</i> ) Slaughtered in Selected Abattoirs in Plateau State, Nigeria                                                     |             |               |                                                                    |                                                |                                      |                           |          | Nematodes = <i>Ancylostoma caninum</i> (3.51%), <i>Toxocara canis</i> (4.83%) and <i>Trichuris vulpis</i> (0.88%)                                                                                 |        |       |
| 2018 | Prevalence of ticks on indigenous breed of hunting dogs in Ogun State, Nigeria                                                                   | Ogun state  | not indicated | Hand-picked ticks from 109 hunting dogs (males = 30, females = 79) | young (80) and adults (29)                     | Microscopically                      | Ticks                     | Parasite | The overall prevalence = 56%, Of the 352 ticks harvested from the hunting dogs, <i>Rhipicepalus sanguineus</i> = 68.2%, <i>Haemaphysalis leachi</i> = 30.6%; <i>Amblyomma variegatum</i> = 1.21%. | Medium | [167] |
| 2018 | <i>Salmonella</i> infection in clinically healthy dogs in Makurdi, Benue State, North-central Nigeria: A potential source of infection to humans | Benue state | not indicated | Rectal swabs from 200 dogs (males = 145, female = 55)              | 0-2 years, >2<4 years, >4<6 years and >6 years | Microbiologically                    | <i>Salmonella</i> species | Bacteria | Positive = 11 (5.5%)                                                                                                                                                                              | Medium | [168] |
| 2018 | Detection and molecular characterisation of <i>Ehrlichia canis</i> in naturally infected dogs in South West Nigeria.                             | Ogun state  | Not indicated | blood samples from 205 dogs (male = 102, females = 103)            | (≤ 1 year) and adult (≥ 1 year)                | microscopy and nested PCR/sequencing | <i>Ehrlichia canis</i>    | Parasite | Microscopy prevalence = 1.5%<br>PCR test = 22.9% positive                                                                                                                                         | Medium | [169] |
| 2018 | Pathological and molecular diagnosis                                                                                                             | Abuja, FCT  | Case report   | Blood sample from the                                              | 1 year                                         | Blood film/ Giemsa stained/ PCR      | Canine babesiosis         | Parasite | Ticks were identified as <i>Rhipicephalus sanguineus</i> . Giemsa stained thin blood                                                                                                              | Good   | [170] |

|      |                                                                                                                                                                                               |                 |                 |                                 |                          |                                                                                                          |                        |          |                                                                                                                                                                                                                                      |        |       |
|------|-----------------------------------------------------------------------------------------------------------------------------------------------------------------------------------------------|-----------------|-----------------|---------------------------------|--------------------------|----------------------------------------------------------------------------------------------------------|------------------------|----------|--------------------------------------------------------------------------------------------------------------------------------------------------------------------------------------------------------------------------------------|--------|-------|
|      | of canine babesiosis in Nigeria: A case report                                                                                                                                                |                 |                 | dog                             |                          | analysis                                                                                                 |                        |          | smear = none of either Babesia or Ehrlichia organisms. GenBank sequencing query confirmed <i>Babesia vogeli</i>                                                                                                                      |        |       |
| 2018 | In search of the vector(s) of <i>Babesia rossi</i> in Nigeria: molecular detection of <i>B. rossi</i> ( <i>Ixodidae</i> ) ticks collected from dogs, circumstantial evidence worth exploring. | Plateau state   | Not indicated   | 66 ticks collected from 31 dogs | Not provided             | Nested PCR and sequence analysis                                                                         | <i>Babesia rossi</i>   | Parasite | Out of a total of 66 tick samples, 12% = <i>R. sanguineus</i> , Sequencing results = other <i>B. rossi</i> isolates. None of the ticks harbored the DNA of <i>B. vogeli</i> or <i>B. canis</i> .                                     | Medium | [171] |
| 2018 | Rabies in a set of eight-week old puppies in Nigeria: the need for review of current dog antirabies vaccination schedule                                                                      | Akwa Ibom state | case report     | Brain tissue from 2 puppies     | 8 weeks old puppies      | Direct fluorescent antibody test (DFAT), the direct rapid immunohistochemically test (DRIT), and RT-PCR. | Rabies virus           | Virus    | it was positive for all tests used                                                                                                                                                                                                   | Good   | [172] |
| 2017 | Genetic diversity among <i>Babesia rossi</i> detected in naturally infected dogs in Abeokuta, Nigeria,                                                                                        | Ogun state      | Random sampling | Blood from 209 dogs             | From 4 months to 7 years | Microscopy and PCR/Sequencing                                                                            | <i>Babesia</i> species | Parasite | Microscopy = 16 (7.7%)<br>Electrophoresed PCR products from 39 (18.66%) dogs displayed homology of 99.74% (387/388) with partial sequences of 18S rRNA gene of <i>Babesia rossi</i> in the GeneBank. Of the two sequences, one was = | Good   | [173] |

|      |                                                                                                                                        |                 |                       |                                                                               |                                 |                         |                                                            |          |                                                                                                                                                                                                                                                                                                                                                                        |      |       |
|------|----------------------------------------------------------------------------------------------------------------------------------------|-----------------|-----------------------|-------------------------------------------------------------------------------|---------------------------------|-------------------------|------------------------------------------------------------|----------|------------------------------------------------------------------------------------------------------------------------------------------------------------------------------------------------------------------------------------------------------------------------------------------------------------------------------------------------------------------------|------|-------|
|      | based on 18S rRNA gene sequences                                                                                                       |                 |                       |                                                                               |                                 |                         |                                                            |          | <i>T. annulata</i> and the second = <i>T. ovis</i> . A significantly ( $p<0.05$ ) higher prevalence of <i>B. rossi</i> was detected by PCR compared to microscopy.                                                                                                                                                                                                     |      |       |
| 2017 | Comparative Study of Ectoparasites of Exotic and Locally Bred Dogs in Ikot Ekpene Local Government Area, Niger-Delta Region of Nigeria | Akwa Ibom State | not indicated         | 60 dogs                                                                       | 12-24, 25-36, 37-48, >48 months | Microscopically         | Ectoparasite                                               | Parasite | Ticks= 107 , 94.6% of ticks identified as <i>Rhipicephalus sanguineus</i>                                                                                                                                                                                                                                                                                              | Good | [174] |
| 2017 | Prevalence of ectoparasites of dogs and cats in Ijero and Moba LGAs, Ekiti State, Nigeria                                              | Ekiti state     | cross-sectional study | parasites manually removed from 200 dogs (female= 125, male= 75) and 200 cats | <6, 6-24, >24 months            | light Microscopy        | Ectoparasite                                               | Parasite | Prevalence in dogs= 170 (85%), fleas ( <i>Ctenocephalides felis</i> , and <i>C. canis</i> ), Mites ( <i>Sarcoptes scabiei</i> , and <i>Otodectes cynotis</i> ) and Ticks ( <i>Rhipicephalus sanguineus</i> and <i>Haemophysa lisleachi</i> ).                                                                                                                          | Good | [175] |
| 2017 | Prevalence and Antibio-gram of Generic Extended-Spectrum $\beta$ -Lactam-Resistant Enterobacteria in Healthy Dogs                      | Enugu state     | cross-sectional study | 100 rectal swabs                                                              | Not provided                    | Microbiological methods | Extended-spectrum $\beta$ -lactam-resistant Enterobacteria | Bacteria | 27 ESBL-resistant enterobacterial isolated: 40.7% = <i>E. coli</i> , 37% = <i>Klebsiella</i> spp, 18.5% = <i>Salmonella</i> spp, while 3.7% = <i>Proteus</i> spp. All the isolates were resistant to ceftazidime and cefotaxime. Resistance to more than 3 classes of antibacterial agents : <i>E. coli</i> = 81.8% , <i>Klebsiella</i> = 70% <i>Salmonella</i> = 100% | Good | [176] |

|      |                                                                                                                                       |               |               |                                                                               |              |                                                                                                                |                            |          |                                                                                                                                                                                                                                                                                                                                                                                                                                                                                                                                                                                                                                                                                                                                                                                                                                                                                       |        |       |
|------|---------------------------------------------------------------------------------------------------------------------------------------|---------------|---------------|-------------------------------------------------------------------------------|--------------|----------------------------------------------------------------------------------------------------------------|----------------------------|----------|---------------------------------------------------------------------------------------------------------------------------------------------------------------------------------------------------------------------------------------------------------------------------------------------------------------------------------------------------------------------------------------------------------------------------------------------------------------------------------------------------------------------------------------------------------------------------------------------------------------------------------------------------------------------------------------------------------------------------------------------------------------------------------------------------------------------------------------------------------------------------------------|--------|-------|
| 2017 | Prevalence of Gastrointestinal Parasites and their impact in Domestic Animals in Vom, Nigeria                                         | Plateau state | not indicated | 204 dogs (out of 1,508 fecal samples from various breeds of domestic animals) | NA           | Microscopic Examination using direct normal saline and iodine method. And Formal Ether Sedimentation Technique | Gastrointestinal parasites | Parasite | <i>Ancylostoma braziliense</i> = 52(12.8%), and <i>Isospora</i> spp (6.4%), <i>Taenia</i> spp (0.5%), <i>Trogloremia salmincolo</i> (0.5%), <i>Toxocara canis</i> (2%), <i>Demodex canis</i> (0.5%) <i>Sarcoptic mites</i> (1.5%), <i>Sarcocystis</i> spp (5.4%).                                                                                                                                                                                                                                                                                                                                                                                                                                                                                                                                                                                                                     | Medium | [177] |
| 2017 | Antibiotic resistance profiling and microbiota of the upper respiratory tract of apparently healthy dogs in Ibadan, SouthWest Nigeria | Oyo state     | not indicated | 173 dog swabs                                                                 | Not provided | Culture/biochemical tests/Kirby-Bauer disk diffusion method.                                                   | Microbiota                 | Bacteria | 222 bacterial isolates: 10 potentially pathogenic: <i>E coli</i> (18.5%), <i>Proteus</i> spp (17.1%), <i>S aureus</i> (14.0%), <i>Klebsiella</i> spp (9.0%), <i>Acinetobacter</i> spp (9.0%), coagulase negative <i>Staphylococcus</i> species (7.7%), <i>Pseudomonas</i> spp (6.8%), <i>Actinobacter</i> spp (6.8%), <i>Citrobacter</i> spp (5.9%) and <i>Streptococcus</i> spp (5.4%). Overall, Gram negative resistance= ciprofloxacin (9.3%), sparfloxacin (16.0%),perfloxacin (17.3%), ofloxacin (21.6%), chloramphenicol (34.6%), gentamycin (36.4%), streptomycin (37.%), septrin (49.4%), amoxillin (59.3%), augmentin (62.3%) while Gram positive bacteria resistance= ciprofloxacin (3.3%), perfloxacin (6.7%), erythromycin (13.3%), streptomycin (21.7%), rocephin (28.3%),septrin (28.3%), gentamycin (36.7%), zinnacef (68.3%), ampiclox (81.7%) and amoxillin (85.0%). | Medium | [178] |

| Multi-drug resistance (MDR) to three or more antimicrobials |                                                                                                                                      |               |                  |                                                    |                              |                                                                           |                        |          |                                                                                                                                                                                                    |        |       |
|-------------------------------------------------------------|--------------------------------------------------------------------------------------------------------------------------------------|---------------|------------------|----------------------------------------------------|------------------------------|---------------------------------------------------------------------------|------------------------|----------|----------------------------------------------------------------------------------------------------------------------------------------------------------------------------------------------------|--------|-------|
| 2017                                                        | Prevalence of <i>Babesia</i> species in hunting dogs in Ogun State South West Nigeria                                                | Ogun state    | not indicated    | 109 dogs blood samples (males= 30 and females= 79) | <1 to >6 years               | Microscopy and Polymerase Chain Reaction (PCR)                            | <i>Babesia</i> species | Parasite | Microscopy = 24 (22%)<br>PCR assay= 52 (47.7%)                                                                                                                                                     | Medium | [179] |
| 2017                                                        | Investigations on the Haemoprotozoan Parasites of Nigerian Local Breed of Dogs in Gwagwalada Federal Capital Territory (FCT) Nigeria | Abuja, FCT    | Random selection | 109 dog blood samples (male= 60, female= 49)       | 0-5 months to 109-120 months | Microscopy                                                                | Haemoprotozoan         | Parasite | Overall 84 (77.1%).<br>Haemoparasites include; <i>Babesia</i> sp. 48 (57.1%), <i>Hepatozoon</i> sp. 33 (39.3%) and <i>Trypanosoma</i> sp. 3 (3.6%). Ticks collected = genus <i>Rhipicephalus</i> . | Good   | [180] |
| 2016                                                        | Canine Trypanosomosis in the University of Nigeria Veterinary Teaching Hospital (UNVTH), Enugu State, Nigeria, Sub-Saharan Africa    | Enugu state   | Not indicated    | 55 dogs blood samples                              | Not provided                 | wet blood films, thin films and microhaematocrit centrifugation technique | Canine Trypanosomosis  | Parasite | 15 (27.27%) were confirmed infected; <i>Trypanosoma congolense</i> = 1, <i>Trypanosoma brucei</i> = 14                                                                                             | Medium | [181] |
| 2016                                                        | Analysis of risk factors and prevalence                                                                                              | Plateau state | not indicated    | 246 dogs blood samples (male= 120, female= 126)    | 2 to 9 years                 | Canine haemoplasma species                                                | Haemoplasma infection  | Bacteria | The species-specific qPCR assays =18 (7.3%), and <i>Candidatus Mycoplasma</i>                                                                                                                      | Medium | [182] |



|      |                                                                                                                                                        |            |                      |                                                 |                            |                                                                                   |                                     |          |                                                                                                                                                                                                                                                                                                    |        |       |
|------|--------------------------------------------------------------------------------------------------------------------------------------------------------|------------|----------------------|-------------------------------------------------|----------------------------|-----------------------------------------------------------------------------------|-------------------------------------|----------|----------------------------------------------------------------------------------------------------------------------------------------------------------------------------------------------------------------------------------------------------------------------------------------------------|--------|-------|
|      | Prevalence of haemoplasma infection in dogs                                                                                                            |            |                      | 103, female =142)                               |                            | Species-specific and generic haemoplasma qPCR assays                              |                                     |          | <i>haematoparvum</i> (CMhp) infection in only one dog (0.4%). Generic haemoplasma qPCR assays = 44 (17.9%)<br>Discordant = 25<br>Non-haemoplasma species= 2 <i>Anaplasma phagocytophilum</i> ,= 1 <i>Anaplasma ovis</i> = 1 <i>Serratia marcescens</i> and <i>Aerococcus</i> spp.= 1               |        |       |
| 2016 | Prevalence and Risk Factors Associated with Faecal Shedding of <i>Cryptosporidium</i> Oocysts in Dogs in the Federal Capital Territory, Abuja, Nigeria | Abuja, FCT | Convenience sampling | 276 dog faecal samples                          | <3, >3-9, >9 months        | Modified Acid Fast (MAF) technique and Enzyme Linked Immunosorbent Assay (ELISA). | <i>Cryptosporidium</i> oocysts      | Parasite | Modified Acid Fast (MAF) staining, = 15 (5.4%) positive for <i>Cryptosporidium</i> oocysts, while 51 (18.5%) = for <i>Cryptosporidium</i> copro-antigens using Enzyme Linked Immunosorbent Assay (ELISA).                                                                                          | Good   | [183] |
| 2016 | Prevalence of potentially zoonotic gastrointestinal parasites in canine faeces in Ibadan, Nigeria                                                      | Oyo state  | Random selection     | 203 faecal samples                              | NA                         | flotation technique/modified McMaster technique                                   | Zoonotic gastrointestinal parasites | Parasite | Prevalence = 43.3% (88/203). Single infection= 69(78.4%) and multiple infections= 19 (21.6%). Parasites; <i>Ancylostoma</i> sp.= 24.6% (50/88), <i>Isospora</i> sp.=14.2% (29/88), <i>Toxocara</i> sp.= 9.8% (20/88), <i>Uncinaria</i> sp.=2.5% (5/88) and <i>Strongyloides</i> sp, = 3.9% (8/88). | Good   | [46]  |
| 2016 | The prevalence, pathogenesis and control of canine and                                                                                                 | Oyo state  | not indicated        | fecal/blood samples from 564 dogs/blood samples | <3 years (dogs)/ <11 years | Clinical examination/flotation technique/modifi                                   | <i>Toxocara canis</i>               | Parasite | Group prevalence = 64.9% by the flotation method: <i>Ancylostoma caninum</i> (54.8%) and <i>Dipylidium caninum</i> (16.7%) while                                                                                                                                                                   | Medium | [83]  |

|      |                                                                                                                                                       |                                     |                                       |                                                                     |                                                                   |                                                                                                 |                                    |               |                                                                                                                                                                                                                                                                                                                                                                                                              |        |       |
|------|-------------------------------------------------------------------------------------------------------------------------------------------------------|-------------------------------------|---------------------------------------|---------------------------------------------------------------------|-------------------------------------------------------------------|-------------------------------------------------------------------------------------------------|------------------------------------|---------------|--------------------------------------------------------------------------------------------------------------------------------------------------------------------------------------------------------------------------------------------------------------------------------------------------------------------------------------------------------------------------------------------------------------|--------|-------|
|      | human toxo-<br>cariosis in<br>Ibadan, Ni-<br>geria                                                                                                    |                                     |                                       | from 128<br>children                                                | (chil-<br>dren)                                                   | ed McMaster<br>tech-<br>nique/Toxoca-<br>ra-Elisa assay<br>for VLM                              |                                    |               | Viscera Larva Migrans<br>(VLM) = 87.5% by ELISA.                                                                                                                                                                                                                                                                                                                                                             |        |       |
| 2016 | The Preva-<br>lence of Gas-<br>trointestinal<br>Helminths<br>(GIH) Infection of Dogs<br>in Makurdi<br>Metropolis                                      | Benue<br>state                      | cross<br>sectional                    | 400 dog<br>fecal sam-<br>ples<br>(male=215<br>and fe-<br>male=185), | (0-6<br>months<br>= 114)<br>and<br>adult (><br>6month<br>s= 286), | macroscopic,<br>simple float-<br>ation and<br>centrifugal<br>sedimenta-<br>tion tech-<br>niques | Gastroin-<br>testinal<br>helminths | Para-<br>site | Prevalence= 73.3%<br><i>Ancylostoma caninum</i> 41.5%,<br><i>Toxocara canis</i> 23% ,<br><i>Dipylidium caninum</i> 14.8%,<br><i>Strongyloides stercoralis</i> 6% ,<br><i>Trichuris vulpis</i> 4.8%,<br><i>Necator americanus</i> 3% ,<br><i>Fasciola</i> species 1.5% ),<br><i>Echinococcus</i> species 1.3% ,<br><i>N. americanus</i> and <i>Fasciola</i><br>species are first report in<br>dogs in Makurdi | Good   | [184] |
| 2016 | Seropreva-<br>lence of can-<br>ine leishma-<br>niasis in<br>Kwara, Oyo<br>and Ogun<br>states of<br>Nigeria                                            | Kwara,<br>Oyo and<br>Ogun<br>states | not indi-<br>cated                    | 273 Canine<br>sera (152<br>females<br>and 121<br>males).            | young<br>(<1<br>year)<br>and<br>adult<br>(>1<br>year)             | ELISA                                                                                           | Leishmania<br>antibodies           | Para-<br>site | Total prevalence = 4.40 %<br>(12/273).                                                                                                                                                                                                                                                                                                                                                                       | Medium | [185] |
| 2016 | Prevalence<br>and risk<br>factors asso-<br>ciated with<br><i>Dirofilaria immitis</i> infec-<br>tion in dogs<br>in Makurdi,<br>Benue State,<br>Nigeria | Benue<br>state                      | not indi-<br>cated                    | 186 blood<br>samples (82<br>males, 104<br>females)                  | ≤<br>1year,<br>>1 year                                            | wet mount,<br>Buffy coat<br>and modified<br>Knott's tech-<br>niques                             | <i>Dirofilaria immitis</i>         | Para-<br>site | <i>Microfilaria</i> = 4 (2.15%).<br>Out of the 4 positive cases,<br>3 (1.61%) were microfilaria<br>and 1 (0.54%) was uniden-<br>tified motile parasite.                                                                                                                                                                                                                                                      | Medium | [186] |
| 2016 | Isolation and<br>PCR Charac-<br>terisation of<br>Thermophilic                                                                                         | Plateau<br>state                    | random-<br>ized<br>cross<br>sectional | 341 fecal<br>sample<br>from 146<br>(42.8%)                          | Adult<br>(268)/p<br>uppy<br>(73)                                  | multiplex<br>PCR                                                                                | <i>Campylo-<br/>bacter</i> spp     | Bac-<br>teria | Overall= 81(23.8 %.)<br>PCR identified <i>C jejuni</i> in<br>41(50.6%), <i>C. coli</i> in 31<br>(38.3%) and mixed infec-                                                                                                                                                                                                                                                                                     | Good   | [92]  |

|      |                                                                                                                                              |                |                              |                                                          |                                              |                                                                                                       |                                    |               |                                                                                                                                                                                                                                                                                                                                                                                                                                                                                                                                                                                                                                                                                                   |        |       |
|------|----------------------------------------------------------------------------------------------------------------------------------------------|----------------|------------------------------|----------------------------------------------------------|----------------------------------------------|-------------------------------------------------------------------------------------------------------|------------------------------------|---------------|---------------------------------------------------------------------------------------------------------------------------------------------------------------------------------------------------------------------------------------------------------------------------------------------------------------------------------------------------------------------------------------------------------------------------------------------------------------------------------------------------------------------------------------------------------------------------------------------------------------------------------------------------------------------------------------------------|--------|-------|
|      | <i>Campylobacter</i><br>Species in<br>Dogs Pre-<br>sented to<br>Selected<br>Veterinary<br>Clinics in Jos,<br>Nigeria                         |                | study                        | male and<br>195 (57.2%)<br>female<br>dogs                |                                              |                                                                                                       |                                    |               | tions in 9 (11.1%) of the 81<br>positive samples.<br>Overall species -based<br>infection rates = 12.0%,<br>9.1% and 2.6% respectively.                                                                                                                                                                                                                                                                                                                                                                                                                                                                                                                                                            |        |       |
| 2016 | Parasites and<br>Pathogens of<br>Ticks ( <i>Rhip-<br/>icephalus</i><br>species Acari:<br>Ixodidae)<br>among Dogs<br>in Edo State,<br>Nigeria | Edo state      | not indi-<br>cated           | Ticks re-<br>moved<br>with for-<br>ceps from<br>157 dogs | be-<br>tween<br>4<br>months<br>and 4<br>yrs. | morphologi-<br>cal<br>keys/microsc<br>opical-<br>ly/bacteriolo<br>gical meth-<br>ods (cultur-<br>ing) | Ticks                              | Para-<br>site | Total ticks = 489: <i>Rhip-<br/>icephalus sanguineus</i><br>(53.57%) (Latreille), <i>Rh.<br/>Pulchellus</i> (42.33%)<br>(Gerstäcker) and <i>Rh. Decol-<br/>oratus</i> (7.36%) Koch.<br>Bacteria= <i>Bacillus cereus</i> ,<br><i>Citrobacter freundii</i> , <i>E. coli</i> , <i>P.<br/>aeruginosa</i> , <i>P. mirabilis</i> and<br><i>Streptococcus aureus</i> ).<br>Fungi ( <i>Aspergillus niger</i> ,<br><i>Fusarium</i> spp., <i>Penicillium</i><br>spp. and <i>Saccharomyces<br/>cerevisiae</i> ) and parasites<br>( <i>Acanthamoeba</i><br>spp., <i>Ascaris lumbricoides</i> ,<br><i>Entamoeba coli</i> , hookworm<br>and <i>Schistosoma haematobi-<br/>um</i> ) were isolated from<br>ticks. | Medium | [187] |
| 2016 | Isolation and<br>Characteriza-<br>tion of <i>Can-<br/>dida albicans</i><br>Associated<br>with Canine<br>Conjunctivi-<br>tis                  | Abuja,<br>FCT  | Conven-<br>ient<br>sampling  | 50 Ocular<br>swabs                                       | Not<br>pro-<br>vided                         | Microbiolog-<br>ical methods<br>(cul-<br>ture/Gram<br>stain/ bio-<br>chemical<br>tests)               | <i>Candida<br/>albicans</i>        | Bac-<br>teria | 10 samples swabs (20%)<br>positive for <i>C. albicans</i>                                                                                                                                                                                                                                                                                                                                                                                                                                                                                                                                                                                                                                         | Medium | [188] |
| 2016 | Prevalence of<br>Gastrointes-<br>tinal Para-                                                                                                 | Borno<br>state | Simple<br>random<br>sampling | 250 dog<br>feecal sam-<br>ples                           | young<br>(<1<br>year=8                       | formol ether<br>and floata-<br>tion concen-                                                           | Gastroin-<br>testinal<br>parasites | Para-<br>site | An overall prevalence of=<br>38% <i>Ancylostoma</i> spp =<br>52(54.8%), <i>Toxocara</i> spp =                                                                                                                                                                                                                                                                                                                                                                                                                                                                                                                                                                                                     | Good   | [189] |

|      |                                                                                                                                                                  |                       |                       |                                                             |                          |                                                           |                                              |          |                                                                                                                                                     |        |        |
|------|------------------------------------------------------------------------------------------------------------------------------------------------------------------|-----------------------|-----------------------|-------------------------------------------------------------|--------------------------|-----------------------------------------------------------|----------------------------------------------|----------|-----------------------------------------------------------------------------------------------------------------------------------------------------|--------|--------|
|      | sites of Hunting Dogs in Maiduguri, Borno State, Nigeria                                                                                                         |                       |                       | (males= 103, females= 147)                                  | 1), adult (>1 year= 169) | tration methods                                           |                                              |          | 14(14.7%), <i>Diphylidium</i> spp= 12(12.6%), <i>Isospora</i> spp = 10(10.5%) and <i>Taenia</i> spp =7(7.3%).                                       |        |        |
| 2016 | Incidence of <i>Dirofilaria immitis</i> in dogs presented at University of Nigeria, Nsukka Veterinary Teaching Hospital using wet smear and buffy coat technique | Enugu state           | not indicated         | Blood from 119 dogs                                         |                          | Wet mount and buffy coat techniques.                      | <i>Dirofilaria immitis</i>                   | Parasite | Prevalence = 3.36%.(4 dogs) for <i>D. immitis</i> microfilaria                                                                                      | Medium | [190]  |
| 2016 | Phenotypic and genotypic detection of methicillin-resistant <i>Staphylococcus aureus</i> in hunting dogs in Maiduguri metropolitan, Borno State, Nigeria         | Borno state           | not indicated         | 416 swab samples from the nasal and perianal region of dogs | Not provided             | Microscopy/culture/Biochemical test/PCR                   | Methicillin-resistant <i>S.aureus</i> (MRSA) | Bacteria | Prevalence= 79.5, )where 2.5% of the isolates = MRSA<br>Isolates sensitive to gentamicin and ciprofloxacin<br>Resistant to ceftiofur and oxacillin. | Medium | [[191] |
| 2016 | Sero-epidemiological survey and risk factors associated with                                                                                                     | Lagos and Ogun states | cross-sectional study | 728 dog sera                                                | <3 years, >3 years       | rapid slide agglutination test (RSA) and Rose Bengal test | Brucellosis                                  | Bacteria | RSA positive= 81 (11.13%)<br>RBT positive = 94 (12.91%)<br>SAT = 4.9 % ( 4/81; 4.94%)<br>and cELISA= 1.1% (1/94; 1.06%),                            | Good   | [192]  |

|      |                                                                                                                   |              |                                     |                                                                         |              |                                                                                                                                                       |                                    |          |                                                                                                                                                                                                                                                                                                                                                                                                                                                                                                                     |        |       |
|------|-------------------------------------------------------------------------------------------------------------------|--------------|-------------------------------------|-------------------------------------------------------------------------|--------------|-------------------------------------------------------------------------------------------------------------------------------------------------------|------------------------------------|----------|---------------------------------------------------------------------------------------------------------------------------------------------------------------------------------------------------------------------------------------------------------------------------------------------------------------------------------------------------------------------------------------------------------------------------------------------------------------------------------------------------------------------|--------|-------|
|      | Brucellosis in dogs in south-western Nigeria                                                                      |              |                                     |                                                                         |              | (RBT)/serum agglutination test (SAT) and competitive enzyme-linked immunosorbent assay (cELISA)                                                       |                                    |          |                                                                                                                                                                                                                                                                                                                                                                                                                                                                                                                     |        |       |
| 2015 | Presence of <i>Trypanosome</i> species and anemic status of dogs in Zuru, Nigeria                                 | Kebbi state  | not indicated                       | 567 dog out of which 192 (33.7%) were randomly examined (blood samples) | Not provided | wet blood films, thin films and microhaematocrit centrifugation technique wet blood films, thin films and microhaematocrit centrifugation technique w | <i>Trypanosome</i> spp             | parasite | 4 (2.08%)<br>All positive samples=<br><i>Trypanosoma brucei</i> group                                                                                                                                                                                                                                                                                                                                                                                                                                               | Medium | [193] |
| 2015 | Zoonotic gastrointestinal parasite burden of local dogs in Zaria, Northern Nigeria: Implications for human health | Kaduna state | Random sampling (residential areas) | 224 samples (residential=101, small animal clinic=100, GIT content=23)  | NA           | Simple flotation, sedimentation, and GIT processing methods.                                                                                          | Zoonotic gastrointestinal parasite | Parasite | Overall= 76(33.9%)<br>Streets and residential quarters of ABU, Zaria; <i>Isospora</i> spp. 12(11.9%), <i>Taenia</i> spp. 6(5.9%), then <i>Toxocara canis</i> (5.0%), <i>Ancylostoma caninum</i> (4.0%), and <i>Dipylidium caninum</i> (1.0%).<br>Small animal: clinic: <i>Isospora</i> spp. (19.0%), <i>T. canis</i> (8.0%), <i>A. caninum</i> (8.0%) and <i>Taenia</i> spp. (5.0%).<br>Gastrointestinal contents from "dog slaughtered houses: <i>T. canis</i> (17.3%), <i>Isospora</i> spp. (13.1%) and <i>A.</i> | Good   | [70]  |

| <i>caninum</i> (4.3%) |                                                                                                                                          |                     |               |                                                                                                               |                                          |                                            |                             |          |                                                                                                                                                                                                                                                                                                                              |        |       |
|-----------------------|------------------------------------------------------------------------------------------------------------------------------------------|---------------------|---------------|---------------------------------------------------------------------------------------------------------------|------------------------------------------|--------------------------------------------|-----------------------------|----------|------------------------------------------------------------------------------------------------------------------------------------------------------------------------------------------------------------------------------------------------------------------------------------------------------------------------------|--------|-------|
| 2015                  | A Case Of Canine Trypanosomosis With Epistaxis In A Two-Year Old Alsatian Dog                                                            | Oyo state           | Case report   | 1 case study (blood sample)                                                                                   | 2-year-old                               | microscopic or parasitological examination | Canine Trypanosomosis       | Parasite | trypanosome parasites observed On blood smear evaluation                                                                                                                                                                                                                                                                     | Good   | [194] |
| 2015                  | A case of Dipylidiasis and Babesiosis in a 2-year old mongrel (bitch)                                                                    | Abuja, FCT          | Case report   | blood/feacal samples                                                                                          | 2years old                               | Details not provided                       | Dipylidiasis and Babesiosis | Parasite | <i>Dipylidium caninum</i> and <i>Babesia canis</i> identified on a thin blood smear.                                                                                                                                                                                                                                         | Good   | [195] |
| 2015                  | A survey of rabies virus antibodies in confined, hunting and roaming dogs in Ogun and Oyo States, Southwestern Nigeria                   | Ogun and Oyo states | Not indicated | sera from 230 (80 confined, 92 hunting and 58 roaming) dogs. Males= 77, females= 153                          | Not provided                             | Indirect ELISA                             | Rabies virus                | Virus    | Overall vaccinated confined dogs in Oyo state =, 13 (5.7%) had optimal RABV antibody titres. confined dog sera in Ogun state= negative.                                                                                                                                                                                      | Medium | [196] |
| 2015                  | Comparison of gastrointestinal helminthes in dogs and awareness of zoonotic infection among dog owners in calabar, South Eastern Nigeria | Cross river state   | not indicated | 1263 faecal samples from dogs attending veterinary clinic and 310 from household dogs (male= 722, female=541) | puppies (752), young (283), adults (228) | Formol-ether concentration techniques      | Gastrointestinal helminthes | Parasite | Prevalence: <i>Ancylostoma caninum</i> 49.51% and 35.71%, <i>Dipylidium caninum</i> 36.0% and 28.57%, <i>Toxocara canis</i> 7.83% and 18.75%, <i>Ascaris</i> species 3.33%, and 10.71% <i>Taenia canis</i> 0.98% and 0.00%, <i>Coccidia</i> oocyst 1.57% and 0.00% and <i>Trichuris vulpis</i> 0.78% and 6.25% respectively. | Medium | [197] |

|      |                                                                                                                                                     |                       |               |                                                                                                  |                     |                                        |                            |          |                                                                                                                                                                                                                                                                                                                                                                                                                                                                                                                                                                                                        |        |       |
|------|-----------------------------------------------------------------------------------------------------------------------------------------------------|-----------------------|---------------|--------------------------------------------------------------------------------------------------|---------------------|----------------------------------------|----------------------------|----------|--------------------------------------------------------------------------------------------------------------------------------------------------------------------------------------------------------------------------------------------------------------------------------------------------------------------------------------------------------------------------------------------------------------------------------------------------------------------------------------------------------------------------------------------------------------------------------------------------------|--------|-------|
| 2015 | Risk factors and level of awareness of canine Brucellosis in Jos, Plateau state, Nigeria.                                                           | Plateau state         | not indicated | 350 sera samples                                                                                 | Not provided        | Rose Bengal plate test (RBPT)          | Canine Brucellosis         | Bacteria | Overall Seropositivity = 113 (32.3%).<br>indoors= 13.9%,<br>managed outdoors= 37.1%                                                                                                                                                                                                                                                                                                                                                                                                                                                                                                                    | Medium | [198] |
| 2015 | Seroprevalence of <i>Toxoplasma gondii</i> in dogs slaughtered for food in Southwestern Nigeria and assessment of knowledge and behavior consumer's | Ondo and Ekiti states | not indicated | 278 dogs sera (male= 190, female= 88)                                                            | young and adult     | Modified agglutination test (MAT)      | <i>Toxoplasma gondii</i>   | Parasite | Overall= 55 (19.8%)                                                                                                                                                                                                                                                                                                                                                                                                                                                                                                                                                                                    | Medium | [199] |
| 2014 | Occurrence of tick-transmitted pathogens in dogs in Jos, Plateau State, Nigeria                                                                     | Plateau state         | not indicated | 100 dogs' blood specimens (55 females and 43 males; in 2 cases the gender/age were not recorded) | <18 months , adults | PCR and Reverse Line Blot (RLB) assays | tick-transmitted pathogens | Parasite | On RLB = 72%. Of the positive specimens, 38 (53%) = <i>B. rossi</i> ; 9 (13%) = <i>Theileria</i> sp. (sable); 5 (7%) with either <i>Ehrlichia canis</i> or <i>Anaplasma</i> sp. <i>Omatjenne</i> , respectively; 3 (4%) = <i>Theileria equi</i> ; and 1 (1%) = <i>B. vogeli</i> and <i>E.ruminantium</i> , respectively. Co-infections = 13 (18%)<br>Total ticks= 146 identified: <i>Rhipicephalus sanguineus</i> 107 (73%), <i>Haemaphysalis leachi</i> (sensu stricto) 27 (18%), <i>R. turanicus</i> 3 (2%), and <i>Amblyomma variegatum</i> , <i>H. elliptica</i> , <i>R. lunulatus</i> , <i>R.</i> | Medium | [200] |

|      |                                                                                                                          |               |                       |                                                                   |                                     |                                                            |                                                                 |          |                                                                                                                                                                                                                                                                                                                                                                                                                                      |        |       |
|------|--------------------------------------------------------------------------------------------------------------------------|---------------|-----------------------|-------------------------------------------------------------------|-------------------------------------|------------------------------------------------------------|-----------------------------------------------------------------|----------|--------------------------------------------------------------------------------------------------------------------------------------------------------------------------------------------------------------------------------------------------------------------------------------------------------------------------------------------------------------------------------------------------------------------------------------|--------|-------|
|      |                                                                                                                          |               |                       |                                                                   |                                     |                                                            |                                                                 |          | <i>muhsamae</i> and <i>R. senegalensis</i> 1 (1%), respectively.                                                                                                                                                                                                                                                                                                                                                                     |        |       |
| 2014 | Assessment of Knowledge, Attitude and Practice of Dog Owners to Canine Rabies in Wukari Metropolis, Taraba State Nigeria | Taraba state  | Cross sectional study | 188 brain samples from slaughtered dogs (Males= 120, females= 68) | 1-12 months (57), >24 months (131)  | Direct fluorescent antibody test                           | Rabies                                                          | Virus    | 15 (7.89%) had rabies antigen                                                                                                                                                                                                                                                                                                                                                                                                        | Good   | [201] |
| 2014 | Seroprevalence of Canine Brucellosis in Jos, Plateau State, Nigeria                                                      | Plateau state | Cluster sampling      | 350 sera samples (male= 132, female= 218)                         | 0-6 months, 6-11 months, >11 months | Rose Bengal Plate Test (RBPT)/ Competitive ELISA (c-ELISA) | Canine Brucellosis                                              | Bacteria | RBPT = 113(32.3%) positive Of these RBPT positives, c-ELISA., = 33(29.2%)                                                                                                                                                                                                                                                                                                                                                            | Good   | [202] |
| 2014 | Methicillin-resistant coagulase-negative staphylococci from healthy dogs in Nsukka, Nigeria                              | Enugu state   | not indicated         | groin swabs of 109 clinically healthy dogs                        | Not provided                        | Culture /biochemical test/ PCR/Sequencing                  | Methicillin-resistant coagulase-negative Staphylococci (MRCoNS) | Bacteria | 16 MRCoNS, all harboring the <i>mecA</i> gene = 14 (12.8%): <i>S. sciuri</i> subspecies <i>rodentium</i> , <i>S. lentus</i> , <i>S. haemolyticus</i> , and <i>S. simulans</i> with <i>S. sciuri</i> subspecies <i>rodentium</i> (62.5%) 81.3% of the MRCoNS were resistant to tetracycline while 75% and 62.5% were resistant to kanamycin and trimethoprim-sulphamethoxazole respectively. MRCoNS were multi-drug resistance (MDR). | Medium | [116] |
| 2014 | <i>Linguatula serrata</i> (Porocephala)                                                                                  | Taraba state  | not indicated         | 777 dogs (male= 471, female=                                      | 1-10, 11-20 weeks                   | buccal (sublingual) examination                            | <i>Linguatula serrata</i> (Porocephala)                         | Parasite | An overall prevalence of 37.45% was recorded.                                                                                                                                                                                                                                                                                                                                                                                        | Medium | [203] |



|      |                                                                                                                                        |                                                            |                       |                                                                                        |                                              |                                                  |                                       |          |                                                                            |        |       |  |
|------|----------------------------------------------------------------------------------------------------------------------------------------|------------------------------------------------------------|-----------------------|----------------------------------------------------------------------------------------|----------------------------------------------|--------------------------------------------------|---------------------------------------|----------|----------------------------------------------------------------------------|--------|-------|--|
|      | lida: Linguatulidae)<br>Infection among Client-Owned Dogs in Jalingo, North Eastern Nigeria: Prevalence and Public Health Implications |                                                            |                       | 306)                                                                                   |                                              |                                                  | phalida: Linguatulidae)               |          |                                                                            |        |       |  |
| 2014 | Prevalence of <i>Salmonella</i> Infection in Dogs in Maiduguri, Northeastern Nigeria                                                   | Borno state                                                | not indicated         | 119 (male=70, female=49)                                                               | <3 months to >2 years                        | Bacteriological methods                          | Salmonella/ antibiotic susceptibility | Bacteria | <i>Salmonella</i> =52 (43.7%).                                             | Medium | [34]  |  |
| 2014 | Prevalence, intensity and associated risk factors for <i>Toxocara canis</i> in Nigeria dogs                                            | Ondo state                                                 | Cross sectional study | 474 dog faecal samples (male=243, female=231)                                          | 0-6, 1-12, 13-18, 19-2, 25-30 and ≥31 months | Kato-Katz technique/light microscopy             | <i>Toxocara canis</i>                 | Parasite | Overall prevalence= 34.6%.<br>Stray =42.4%<br>Domiciliated = 20.6%         | Good   | [204] |  |
| 2014 | Echinococcus <i>granulosus</i> Prevalence in Dogs in Southwest Nigeria                                                                 | South-western region (Ekiti, Lagos, Oyo, Ogun, Ondo, Osun) | Purposive sampling    | 273 canine sera; male=122, female=151 (207 rural hunting and 66 urban companion dogs). | young: <1 year, adult: ≥1 year               | Direct enzyme linked immunosorbent assay (ELISA) | <i>Echinococcus granulosus</i>        | Parasite | Total prevalence= 12.45% (34/273).<br>Hunting =15.94%<br>Companion =1.52%. | Good   | [205] |  |
| 2014 | Serological                                                                                                                            | Oyo state                                                  | not indi-             | Sera from                                                                              | Not                                          | Heamagglu-                                       | canine                                | Virus    | Anti-CIV H3N8 antibodies                                                   | Medium | [206] |  |

|      |                                                                                                                                |            |                 |                                                     |                                     |                                                                                    |                                                         |          |                                                                                                                                                                                                                                                     |        |       |
|------|--------------------------------------------------------------------------------------------------------------------------------|------------|-----------------|-----------------------------------------------------|-------------------------------------|------------------------------------------------------------------------------------|---------------------------------------------------------|----------|-----------------------------------------------------------------------------------------------------------------------------------------------------------------------------------------------------------------------------------------------------|--------|-------|
|      | survey for emerging canine H3N8 and H3N2 influenza viruses in pet and village dogs in Nigeria                                  |            | cated           | 185 dogs (96 pet dogs, and 89 village hunting dogs) | provided                            | tination inhibition (HI) assay                                                     | Influenza virus (CIV) of equine (H3N8) and avian (H3N2) |          | in pet dogs =51 (53.1%) and village dogs= 24 (27.0%). Overall, positive for CIV H3N8 antibodies= 40.5% (75/185) while none contained anti-CIV H3N2 antibodies                                                                                       |        |       |
| 2014 | Canine Echinococcosis in Hunting and Companion Dogs in Oyo State, Nigeria: The Public Health Significance                      | Oyo state  | not indicated   | 155 canine sera (male=81, female= 74)               | Young (< 1year) and adult (1 year). | Direct enzyme linked immunosorbent assay (ELISA)                                   | Canine Echinococcosis                                   | Parasite | Total prevalence = 9.68%                                                                                                                                                                                                                            | Medium | [207] |
| 2014 | Infection of dogs with <i>Babesia canis</i> in Gwagwalada metropolis of Federal Capital Territory, Abuja, Nigeria              | Abuja, FCT | Random sampling | 101 Blood samples (male= 59, female= 42)            | Adult(>6mnths); Puppy (<6mnts)      | Blood film (Giemsa stain)                                                          | <i>Babesia canis</i>                                    | Parasite | Infection rate of 9/101 (8.9%).                                                                                                                                                                                                                     | Good   | [208] |
| 2014 | Isolation of pathogenic bacteria and antibiotic susceptibility testing of dogs with otitis externa in Aba, Abia state, Nigeria | Abia state | not indicated   | 48 dog ear swaps                                    | 1-11 months, 1-4years, >6years      | Bacteriological examination (morphology, cultural and biochemical characteristics) | Pathogenic bacteria                                     | Bacteria | Positive isolates= 42(87.5%); <i>Pseudomonas</i> spp. = 18 (42.9%), <i>Staphylococcus</i> spp. = 12(28.7%), <i>E. coli</i> = 6(14.3%), <i>Streptococcus</i> spp. = 3 (7.1%), <i>Proteus</i> spp. = 2(4.2%) and <i>Enterococcus</i> spp. = 1 (2.4%). | Medium | [209] |

|      |                                                                                                                                                      |              |                 |                                                      |                   |                                                                                                                           |                                                                |           |                                                                                                                                                                                                                                                                                                                                                                                                                           |        |       |
|------|------------------------------------------------------------------------------------------------------------------------------------------------------|--------------|-----------------|------------------------------------------------------|-------------------|---------------------------------------------------------------------------------------------------------------------------|----------------------------------------------------------------|-----------|---------------------------------------------------------------------------------------------------------------------------------------------------------------------------------------------------------------------------------------------------------------------------------------------------------------------------------------------------------------------------------------------------------------------------|--------|-------|
| 2014 | Prevalence of intestinal protozoan parasites in stray and domicile dogs in Ilorin, North Central, Nigeria                                            | Kwara state  | Random sampling | 108 stool specimen (males= 63, females =45)          | 1-4 years         | Formal-ether sedimentation method.                                                                                        | Protozoan parasites                                            | Para-site | Overall prevalence = 64(59.3%); <i>Anchylostoma</i> sp, <i>Cryptosporidium</i> sp and <i>Isospora</i> sp.                                                                                                                                                                                                                                                                                                                 | Good   | [210] |
| 2014 | Multidrug resistant verocytotoxin-producing <i>Escherichia coli</i> O157:H7 in the faeces of diarrhoeic and non diarrhoeic dogs in Abeokuta, Nigeria | Ogun state   | not indicated   | feces of diarrhoeic (31) and non-diarrhoeic (63) dog | puppies, adults   | Culture/ slide agglutination test/ Kirby-Bauer disk diffusion method/ reverse passive latex agglutination test            | Verocytotoxin-producing <i>Escherichia coli</i> (VTEC) O157:H7 | Bacteria  | <i>Escherichia coli</i> O157:H7 isolated = 22 (23.4%)<br>Diarrhoeic = 5 (16.1%)<br>Non-diarrhoeic =17 (26.9%)<br>Verocytotoxin 1 (VT1) = 10 (45.5%) out of 22 isolates, VT2= 8 (36.4%), while both toxin types = 4 (18.2%)<br>16 (72.7%) out of 22 isolates= resistant to at least three antimicrobials from different classes,                                                                                           | Medium | [35]  |
| 2014 | Antimicrobial resistance in aerobic bacteria isolated from oral cavities of hunting dogs in rural areas of Ogun State, Nigeria                       | Ogun state   | not indicated   | 62 oral swaps from hunting dogs                      | 6months and above | Colonial morphology, microscopy (following Gram's staining) and biochemical characterization/ Kirby-Bauer disk diffusion. | Aerobic bacteria                                               | Bacteria  | Aerobic bacterial isolates=101 <i>Bacillus</i> spp 41(40.6%), <i>Staphylococcus</i> spp 19(18.8%), <i>Pseudomonas</i> spp 8(7.9%), <i>Burkholderia</i> spp 8(7.9%), <i>Streptococcus</i> spp 7(6.9%), <i>Escherichia</i> spp 5(5%), <i>Aeromonas</i> spp 3(3%), <i>Shewanella</i> spp 3(3%), <i>Citrobacter</i> spp 2(1.9%), <i>Pasteurella</i> spp 2(1.9%), <i>Vibrio</i> spp 2(1.9%) and <i>Enterobacter</i> spp 1(1%). | Medium | [211] |
| 2014 | Potential Risks for Rabies                                                                                                                           | Bauchi state | not indicated   | 202 heads of dog; Male=                              | <1, 1-5, >5 years | Fluorescent antibody test                                                                                                 | Rabies virus                                                   | Virus     | 46 (22.8%) of the brain samples tested were positive for rabies                                                                                                                                                                                                                                                                                                                                                           | Medium | [212] |

|      |                                                                                                                                            |                                           |                       |                                                                                             |                                                                 |                                  |                        |          |                                                                                                                                                                                                                                                                                                                                                  |        |       |  |
|------|--------------------------------------------------------------------------------------------------------------------------------------------|-------------------------------------------|-----------------------|---------------------------------------------------------------------------------------------|-----------------------------------------------------------------|----------------------------------|------------------------|----------|--------------------------------------------------------------------------------------------------------------------------------------------------------------------------------------------------------------------------------------------------------------------------------------------------------------------------------------------------|--------|-------|--|
|      | Spill-Over from Apparently Healthy Dogs to Wildlife in Bauchi State, Nigeria                                                               |                                           |                       | 62.5%, female= 37.5%                                                                        |                                                                 |                                  |                        |          |                                                                                                                                                                                                                                                                                                                                                  |        |       |  |
| 2014 | Assessment of Risk of Possible Exposure to Rabies among Processors and Consumers of Dog Meat in Zaria and Kafanchan, Kaduna State, Nigeria | Kaduna state                              | Cross-sectional study | 154 brain samples from slaughtered dogs (74 from Zaria and 80 from Kafanchan)               | Not provided                                                    | Direct fluorescent antibody test | Rabies virus           | Virus    | 6 (3.9%)<br>Zaria= 4 (5.4%)<br>Kafanchan = 2(2.5%)                                                                                                                                                                                                                                                                                               | Good   | [33]  |  |
| 2013 | First detection and molecular characterization of <i>Ehrlichia canis</i> from dogs in Nigeria                                              | Plateau state                             | not indicated         | 100 dog blood samples                                                                       | Not provided                                                    | PCR and sequence analysis        | <i>Ehrlichia canis</i> | Parasite | 11 positive in nested PCR for <i>E. canis</i> .                                                                                                                                                                                                                                                                                                  | Medium | [213] |  |
| 2013 | Molecular detection and characterization of tick-borne pathogens in dogs and ticks from Nigeria.                                           | Plateau, Kaduna, Kwara, and Rivers states | not indicated         | Blood and ticks collected from 181 dogs (males= 66 (36.5%), females= 102 (56.4%). No infor- | 0–6 months, 32%; 7–12 months, 30.9%; 13–24 months, 19.9%; 25–36 | PCR and sequencing               | Tick-borne Pathogens   | Parasite | <i>Rhipicephalus sanguineus</i> , <i>Rhipicephalus turanicus</i> and <i>Heamaphysalis leachi</i><br>Blood= DNA of <i>Hepatozoon canis</i> (41.4%), <i>Ehrlichia canis</i> (12.7%), <i>Rickettsia</i> spp. (8.8%), <i>Babesia rossi</i> (6.6%), <i>Anaplasma platys</i> (6.6%), <i>Babesia vogeli</i> (0.6)<br>In ticks= . DNA of <i>E. canis</i> | Medium | [214] |  |

|      |                                                                                                    |              |                 |                                                                           |                                                                                               |                                                  |                                                  |          |                                                                                                                                                                                                                                                                                                                                                                                                                                                                                                                                                                                                                                    |        |       |  |
|------|----------------------------------------------------------------------------------------------------|--------------|-----------------|---------------------------------------------------------------------------|-----------------------------------------------------------------------------------------------|--------------------------------------------------|--------------------------------------------------|----------|------------------------------------------------------------------------------------------------------------------------------------------------------------------------------------------------------------------------------------------------------------------------------------------------------------------------------------------------------------------------------------------------------------------------------------------------------------------------------------------------------------------------------------------------------------------------------------------------------------------------------------|--------|-------|--|
|      |                                                                                                    |              |                 | mation on sex was available for 13 (7.2%)).                               | months , 3.9%; .36 months , 5%, while no information on age was available for 15 (8.3%) dogs. |                                                  |                                                  |          | (23.7%), <i>H. canis</i> (21.1%), <i>Rickettsia</i> spp. (10.5%), <i>Candidatus Neoehrlichia mikurensis</i> (5.3%) and <i>A. platys</i> (1.9%)<br>Co- infections =37%<br>Co-infected with 3 pathogens= 1 dog<br>DNA of <i>Rickettsia conorii israelensis</i> = 1 dog and <i>Rhipicephalus sanguineus</i> tick. DNA of human pathogen, <i>Candidatus N. mikurensis</i> = <i>Rhipicephalus sanguineus</i> and <i>Heamaphysalis leachi</i> ticks, first description of <i>Candidatus N. mikurensis</i> in Africa. The <i>Theileria</i> sp. DNA detected in a local dog had 98% sequence identity to <i>Theileria ovis</i> from sheep. |        |       |  |
| 2013 | Prevalence of <i>Babesia canis</i> and <i>Hepatozoon canis</i> in Zaria, Nigeria                   | Kaduna state | not indicated   | Blood samples collected from 150 dogs. Males= 84 (56%), females= 66 (44%) | >1 year and <1 year                                                                           | Giemsa stained thin blood smear/ microscopically | <i>Babesia canis</i> and <i>Hepatozoon canis</i> | Parasite | Overall= 26(17.3%): <i>B. canis</i> = 10(38.5%) and <i>H. canis</i> = 12(46.2%)<br>Mixed infection= 4(15.4%)<br>All infected dogs = tick vector <i>Rhipicephalus sanguineus</i>                                                                                                                                                                                                                                                                                                                                                                                                                                                    | Medium | [215] |  |
| 2013 | Prevalence of zoonotic gastrointestinal helminth in dogs and knowledge of risk of infection by dog | Oyo state    | Random sampling | Fecal samples from 104 (61 males, 43 females)                             | 0-6 months<br>,6-2 months<br>, 1-3 years,<br>3-6 years,<br>>6years                            | saturated salt solution method                   | Zoonotic Gastrointestinal parasites              | Parasite | Overall= 26 (25%)<br><i>Ancylostoma caninum</i> = 16.35%, <i>Toxocara canis</i> = 3.85% and mixed = 4.81%<br>Rural= 73.1%<br>Urban= 26.9%                                                                                                                                                                                                                                                                                                                                                                                                                                                                                          | Good   | [216] |  |

|      |                                                                                                                                                              |                   |                            |                                                                  |                                       |                                                                                                               |              |          |                                                                                                                                                                                                 |        |       |  |
|------|--------------------------------------------------------------------------------------------------------------------------------------------------------------|-------------------|----------------------------|------------------------------------------------------------------|---------------------------------------|---------------------------------------------------------------------------------------------------------------|--------------|----------|-------------------------------------------------------------------------------------------------------------------------------------------------------------------------------------------------|--------|-------|--|
|      | owners in Ibadan, Nigeria                                                                                                                                    |                   |                            |                                                                  |                                       |                                                                                                               |              |          |                                                                                                                                                                                                 |        |       |  |
| 2013 | Detection of rabies antigen in the saliva and brains of apparently healthy dogs human consumption and its public health implications in Abia state, Nigeria. | Abia state        | Convenient random sampling | 100 samples each of saliva and brain (males= 36%, females= 64 %) | Not provided                          | Saliva= Rapid immune-chromatographic test (RICT) while Brain samples= direct fluorescent antibody test (DFAT) | Rabies virus | Virus    | 5% tested positive for rabies antigen with the use of both tests;                                                                                                                               | Good   | [131] |  |
| 2013 | Prevalence of intestinal helminths of dog ( <i>canis familiaris</i> ) in some new layouts of Sokoto metropolis                                               | Sokoto state      | Not indicated              | 150 fecal samples (72 males, 78 females)                         | <6 months , 6mn-1 yr, 1-2 yrs, >2 yrs | floatation technique                                                                                          | Helminth     | Parasite | Overall= 128<br><i>Ancylostoma</i> sp (48.4%),<br><i>Dipylidium caninum</i> (27.3%),<br><i>Echinococcus/Teania</i> (3.9%),<br><i>Toxoscaris</i> (1.6%),<br><i>Diphylobothrium latum</i> (0.8%). | Medium | [131] |  |
| 2013 | Rabies in a Vaccinated 9-Month-Old German Shepherd Dog, Akure, 2010: A Case Report                                                                           | Ondo state        | Case report                | brain specimen from 1 German shepherd; female                    | 9 months                              | Fluorescent antibody technique (seller's method)                                                              | Rabies       | Virus    | positive FAT confirms rabies                                                                                                                                                                    | Good   | [217] |  |
| 2013 | Detection of rabies antigen in the brain tissues of apparently                                                                                               | Cross river state | Cross sectional studies    | 177 brain stem samples from slaughter (males;                    | 1-24 months , >24 months              | Fluorescent antibody technique                                                                                | Rabies       | Virus    | 6(3.39%) were positive for rabies antigen                                                                                                                                                       | Good   | [218] |  |

|      |                                                                                                                                                                                             |               |               |                                                 |                                                                                      |                                   |                                                                    |          |                                                                                                                                                                                                                                                                                                                                                                                                                                                                                                                                                        |        |       |  |
|------|---------------------------------------------------------------------------------------------------------------------------------------------------------------------------------------------|---------------|---------------|-------------------------------------------------|--------------------------------------------------------------------------------------|-----------------------------------|--------------------------------------------------------------------|----------|--------------------------------------------------------------------------------------------------------------------------------------------------------------------------------------------------------------------------------------------------------------------------------------------------------------------------------------------------------------------------------------------------------------------------------------------------------------------------------------------------------------------------------------------------------|--------|-------|--|
|      | healthy dogs slaughtered in Ogoja-Cross River State, Nigeria.                                                                                                                               |               |               | 98(55.4%), females; 76 (96.2%)                  |                                                                                      |                                   |                                                                    |          |                                                                                                                                                                                                                                                                                                                                                                                                                                                                                                                                                        |        |       |  |
| 2013 | Antimicrobial resistance of Gram-negative aerobic bacteria isolates from the faeces of diarrhoeic and non-diarrhoeic dogs in Abeokuta, Nigeria                                              | Ogun state    | Not indicated | diarrhoeic dogs (31), non-diarrhoeic dogs (63)  | Not provided                                                                         | Kirby-Bauer disk diffusion method | Resistant Gram-negative aerobic bacteria                           | Bacteria | Overall= 33 isolates diarrhoeic dogs = <i>E. coli</i> (12), <i>Citrobacter</i> spp. (3), <i>Proteus</i> spp. (3), <i>Klebsiella</i> spp. (9) and <i>Morganella morganii</i> (6) ). Non-diarrhoeic dogs= <i>E. coli</i> (44), <i>Citrobacter</i> spp. (5), <i>Proteus</i> spp. (9), <i>Klebsiella</i> spp. (14), <i>Morganella morganii</i> (1), <i>Burkholderia</i> spp. (3), <i>Actinobacillus</i> spp. (2), <i>Aeromonas</i> spp. (2), <i>Yersinia</i> spp. (2), <i>Enterobacter</i> spp. (5), <i>Haffinia</i> spp. (1) and <i>Serratia</i> spp. (6) | Medium | [219] |  |
| 2012 | Molecular identification of <i>Cordylobia anthropophaga</i> Blanchard (Diptera: Calliphoridae) larvae collected from dogs ( <i>Canis familiaris</i> ) in Jos South, Plateau State, Nigeria. | Plateau state | Not indicated | Myiasis-causing larvae were extracted from dogs | Different stages of larvae (N = 200) picked from dermal layer of the skin of 50 dogs | PCR/ cloning/sequencing           | <i>Cordylobia anthropophaga</i> Blanchard (Diptera: Calliphoridae) | Parasite | All larvae were confirmed as <i>Cordylobia anthropophaga</i> Blanchard (Diptera: Calliphoridae)                                                                                                                                                                                                                                                                                                                                                                                                                                                        | Medium | [220] |  |
| 2012 | Prevalence of                                                                                                                                                                               | Sokoto        | not indi-     | Faecal                                          | NA                                                                                   | Concentra-                        | Intestinal                                                         | Para-    | Overall= 29 (72.5%:                                                                                                                                                                                                                                                                                                                                                                                                                                                                                                                                    | Medium | [221] |  |

|      |                                                                                                     |               |                       |                                                                                                                                        |                                             |                                                                        |                                 |          |                                                                                                                                                                                                                                                                                                                                                                                                                                                       |        |        |
|------|-----------------------------------------------------------------------------------------------------|---------------|-----------------------|----------------------------------------------------------------------------------------------------------------------------------------|---------------------------------------------|------------------------------------------------------------------------|---------------------------------|----------|-------------------------------------------------------------------------------------------------------------------------------------------------------------------------------------------------------------------------------------------------------------------------------------------------------------------------------------------------------------------------------------------------------------------------------------------------------|--------|--------|
|      | intestinal parasites of dogs slaughtered at Mami market area, Sokoto, Nigeria                       | state         | cated                 | samples of 40 different local dogs                                                                                                     |                                             | tion techniques; sedimentation (formal-ether) and floatation (sucrose) | parasites                       | site     | Nematodes= <i>Ancylostoma</i> spp, <i>Uncinaria</i> spp, <i>Trichostrongylus</i> spp, <i>Toxocara</i> spp, <i>Gongylonema pulchrum</i> , <i>Trichuris vulpis</i> , <i>Graphidium strigosum</i> and <i>Toxascaris leonina</i> . Cestodes = <i>Diphylium caninum</i> , <i>Diphyllobothrium latum</i> , <i>Taenia</i> spp and <i>Diphylium caninum</i> . Trematodes = <i>Nanophytus salmincola</i> . Protozoa= <i>Giardia</i> spp, <i>Isospora belli</i> |        |        |
| 2012 | Prevalence of ecto-, endo- and haemo-parasites in slaughtered dogs in Maiduguri, Nigeria            | Borno state   | cross sectional study | 543 samples from 181 randomly selected dogs (118 males and 63 females). Blood samples/picked out ecto and endo parasites/fecal samples | 107 were adults whereas 74 were young dogs. | Giemsa stain/light microscope/McMaster technique                       | ecto-, endo- and haemoparasites | Parasite | Slaughtered dogs= 47.0% (Ectoparasites) , 13.8% (intestinal helminths); 5.5% (haemoparasites.) Coinfections = 10.5%. Ectoparasites = <i>Rhipicephalus sanguineus</i> (24.3%) , <i>Boophilus</i> spp. (13.3%) and <i>Amblyomma</i> spp. (9.4%), Endoparasites= <i>Toxocara canis</i> (5.0%), <i>Dipylidium caninum</i> (2.8%) and <i>Ancylostoma caninum</i> (6.1%) and blood parasites= <i>Ehrlichia canis</i> and <i>Babesia canis</i>               | Good   | [222]  |
| 2012 | Pathogenic bacteria associated with cutaneous canine myiasis due to <i>Cordylobia anthropophaga</i> | Plateau state | not indicated         | 133 myiasis wound swabs and <i>Cordylobia anthropophaga</i> larvae were collected from infested dogs                                   | 1 to 100 weeks                              | Microscopic, cultural and biochemical methods.                         | Pathogenic bacteria             | Bacteria | <i>S. aureus</i> 75 (56.4%), <i>Streptococcus</i> spp. 16 (12%) and <i>E. coli</i> 7 (5.3%). Others = <i>Staphylococcus epidermidis</i> and <i>Corynebacteria</i> spp. Pure bacteria isolates = 94.7% (126), while mixed infection= 5.3% (7).                                                                                                                                                                                                         | Medium | [223]] |



|      |                                                                                                                                  |                              |                      |                                                                                                                                                                                       |              |                                                                  |                                     |          |                                                                                                                                                                                                                                                                                                                                                                                                                |        |       |
|------|----------------------------------------------------------------------------------------------------------------------------------|------------------------------|----------------------|---------------------------------------------------------------------------------------------------------------------------------------------------------------------------------------|--------------|------------------------------------------------------------------|-------------------------------------|----------|----------------------------------------------------------------------------------------------------------------------------------------------------------------------------------------------------------------------------------------------------------------------------------------------------------------------------------------------------------------------------------------------------------------|--------|-------|
| 2012 | Molecular identification of tick-borne pathogens in Nigerian ticks                                                               | Plateau and Nassarawa states | NA                   | A total of 218 tick samples, <i>Amblyomma variegatum</i> (N = 153), <i>Rhipicephalus (Boophilus) decoloratus</i> (N = 45), and <i>Rhipicephalus sanguineus</i> (N = 20) were sampled. | NA           | PCR, cloning and sequencing or reverse line blot techniques      | tick-borne pathogens                | Parasite | Pathogens identified in ticks = piroplasmids ( <i>Babesia</i> spp., <i>Babesia bigemina</i> and <i>Babesia divergens</i> ), <i>Anaplasma marginale</i> and <i>Rickettsia africae</i> .<br><i>A. variegatum</i> = Piroplasmids, in <i>R. decoloratus</i> = <i>A. marginale</i> All ticks = <i>R. africae</i><br>33 (15.1%) of total ticks = pathogen DNA, ( <i>B. divergens</i> and <i>R. africae</i> )         | Medium | [224] |
| 2012 | Survey of zoonotic gastrointestinal parasites of dogs ( <i>Canis familiaris</i> ) slaughtered at Zuru area, Kebbi state, Nigeria | Kebbi state                  | Convenience sampling | 52 fecal samples (33 males and 19 females)                                                                                                                                            | Not provided | Zinc sulfate floatation technique/microscopy                     | zoonotic gastrointestinal parasites | Parasite | Overall prevalence = 41(78.85%). Nematode = <i>Uncinaria stenocephala</i> 21(32.31%), <i>Ancylostoma</i> spp. 10(15.38%), <i>Toxocara canis</i> 7(10.77%), <i>Strongyloides stercoralis</i> 5(7.69%) and <i>Toxocara leonina</i> 2(3.07%), Cestode:- <i>Dipylidium caninum</i> 5(7.69%), <i>Taenia</i> spp. 5(7.69%), Trematode:- <i>Alaria</i> spp. 4(6.15%) and Protozoan:- <i>Isospora</i> spp. 6(9.23%), , | Good   | [68]  |
| 2012 | Multi-drug resistant bacteria isolated from dogs presented with otitis externa in a Veterinary Teach-                            | Oyo state                    | not indicated        | ear swabs from 4 dogs                                                                                                                                                                 | Not provided | Bacteriological examination/in-vitro antibiotic sensitivity test | Multi-drug resistant bacteria       | Bacteria | <i>Crynebacterium diphtheriae</i> , <i>E. coli</i> , <i>S. aureus</i> , <i>Pseudomonas diminuta</i> and <i>Proteus mirabilis</i> All = multi-drug resistant to 6-11 different combinations of aminoglycosides, fluoroquinolones and cephalosporins group of drugs;                                                                                                                                             | Medium | [225] |

| ing Hospital in Nigeria |                                                                                                                               |                      |               |                                                               |                                                                                               |                                                                     |                                             |          |                                                                                                                                                                 |        |       |
|-------------------------|-------------------------------------------------------------------------------------------------------------------------------|----------------------|---------------|---------------------------------------------------------------|-----------------------------------------------------------------------------------------------|---------------------------------------------------------------------|---------------------------------------------|----------|-----------------------------------------------------------------------------------------------------------------------------------------------------------------|--------|-------|
| 2011                    | Seroprevalence of <i>Brucella abortus</i> and <i>B. canis</i> in household dogs in southwestern Nigeria: A preliminary report | Lagos and Oyo states | not indicated | 366 dogs blood samples (males=204; females=162)               | Puppy (day old to <6 months = 17); young adult (6 months to <1 year=65); adults (>1 year=284) | rose bengal test (RBT) and the rapid slide agglutination (RSA) test | <i>Brucella abortus</i> and <i>B. canis</i> | Bacteria | Seropositive to <i>B. abortus</i> = 5.46 % (20/366) and <i>B. canis</i> = 0.27 % (1/366). RBT positive= 11 (30.6 %)                                             | Medium | [226] |
| 2011                    | Prevalence of Avian Origin H5 and H7 Influenza Virus Antibodies in Dogs in Ibadan and Sagamu, Southwestern Nigeria            | Oyo and Osun states  | not indicated | 162 dogs sera (85 exotic breeds and 77 Nigerian village dogs) | between 4 months and 8 years                                                                  | Heamagglutination inhibition (HI) test                              | H5 and H7 influenza virus antibodies        | Virus    | 2 (2.6%) of the village dogs were positive for H7 antibodies at a titer of 1:32.                                                                                | Medium | [227] |
| 2011                    | Emergence of Zoonotic Myiasis in Vom and Bukuru Metropolis, Jos South LGA, Plateau State, Nigeria                             | Plateau state        | not indicated | 6 individuals (3 males and 3 females). 510 dogs examined      | 1-12 months, 2-3 years, >4 years                                                              | Microscopy                                                          | Zoonotic Myiasis                            | Parasite | Overall= 47(9.2%) had larvae in their cutaneous tissues. The larvae extracted from humans and dogs were all identified to be of <i>Cordylobia anthropophaga</i> | Medium | [86]  |
| 2011                    | Prevalence of                                                                                                                 | Kaduna               | not indicated | Intestines                                                    | Adult                                                                                         | Microscop-                                                          | Helminth                                    | Para-    | Overall= 63                                                                                                                                                     | Medium | [228] |

|      |                                                                                                       |                                                                                      |                    |                                                                                                                                                                                                                 |                   |                                                                                                                                                                     |                                 |               |                                                                                                                                                                                                                                                                                                |        |       |
|------|-------------------------------------------------------------------------------------------------------|--------------------------------------------------------------------------------------|--------------------|-----------------------------------------------------------------------------------------------------------------------------------------------------------------------------------------------------------------|-------------------|---------------------------------------------------------------------------------------------------------------------------------------------------------------------|---------------------------------|---------------|------------------------------------------------------------------------------------------------------------------------------------------------------------------------------------------------------------------------------------------------------------------------------------------------|--------|-------|
|      | intestinal helminthes of dogs that have been disposed off at non-descript abattoirs in Zaria, Nigeria | state                                                                                | cated              | from seventy (70) dogs (male= 41, female= 29)                                                                                                                                                                   |                   | ic/macrosco-<br>pic features                                                                                                                                        | parasites                       | site          | (90.00%)positive<br>Cestodes: Dipylidium<br>caninum= 35 (50.00%),<br>Taenia spp= 20 (28.57%),<br>Nematodes:<br><i>Ancylostoma caninum</i> = 25<br>(35.71%) and <i>Toxocara ca-<br/>nis</i> = 4(5.71%). Single in-<br>fection= 61.40%, Double<br>infection = 27.40%<br>Triple infection= 1.40%. |        |       |
| 2011 | Parasitic Causes of anaemia in Dogs in Vom, Nigeria                                                   | Plateau state                                                                        | not indi-<br>cated | 114 blood and 84 fecal sam-<br>ples from<br>dogs                                                                                                                                                                | Not pro-<br>vided | Giem-<br>sa-stained<br>thin blood<br>smears /<br>simple float-<br>ation, using<br>saturated<br>sodium chlo-<br>ride and<br>formol ether<br>concentration<br>methods | Parasites<br>causing<br>Anaemia | Para-<br>site | Overall prevalence = 42%<br>(haemoparasites) and 31%<br>(helminths). <i>Babesia canis</i><br>sensu lato (27%) and <i>Tox-<br/>ocara canis</i> (12%).<br>Either haemo- or intestinal<br>parasites or both= 37%                                                                                  | Medium | [229] |
| 2011 | Dermato-<br>phytoses in<br>domesticated<br>animals                                                    | Enugu,<br>Anam-<br>bra, Eb-<br>onyi,<br>Abia,<br>Imo,<br>Kogi and<br>Delta<br>states | not indi-<br>cated | Skin<br>scrapings,<br>hair and<br>scales from<br>538 ani-<br>mals (55<br>cows, 40<br>sheep, 40<br>pigs, 105<br>dogs, 77<br>cats, 130<br>goats, 25<br>horses, 18<br>rabbits, 66<br>chickens<br>and 22<br>ducks.) | Not pro-<br>vided | Cul-<br>ture/macro-<br>and micro<br>morphologi-<br>cal examina-<br>tion/ rDNA<br>internal<br>transcribed<br>spacer region<br>2 (ITS 2)<br>sequencing                | Dermato-<br>phytes              | Fun-<br>gi    | Overall= 52 (49.5%)<br><i>M. canis</i> = 39 (75%)<br><i>T. mentagrophytes</i> =<br>9(17.3%), <i>M. gypseum</i> = 3<br>(5.8%) and<br><i>M. persicolor</i> = 1 (1.9%).                                                                                                                           | Medium | [230] |

|      |                                                                                                                |                                       |                          |                                                                                     |                                                                  |                                  |                                           |          |                                                                                                                                                                                                                                                                   |        |       |
|------|----------------------------------------------------------------------------------------------------------------|---------------------------------------|--------------------------|-------------------------------------------------------------------------------------|------------------------------------------------------------------|----------------------------------|-------------------------------------------|----------|-------------------------------------------------------------------------------------------------------------------------------------------------------------------------------------------------------------------------------------------------------------------|--------|-------|
| 2011 | Prevalence of antibody against rabies among confined. Free-roaming and stray dogs in a transit city of Nigeria | Kwara state                           | Stratified randomization | Sera from 190 dogs (106 males and 84 females)                                       | <1, 1-2.9, 3-5.9, 6-8.9, ≥9 years                                | Indirect ELISA                   | Rabies virus                              | Virus    | Overall= 81 (42.6%). Consisting of 57 confined (49.1%), 23 free-roaming (37.7%) and 1 stray (7.7%),                                                                                                                                                               | Good   | [231] |
| 2011 | Epidemiology of intestinal helminth parasites in stray dogs from markets in south-eastern Nigeria              | Enugu and Anambra states              | not indicated            | 413 dog faecal samples                                                              | pup (<6 months), sub-adult (6–24 months) and adult (>24 months). | Kato–Katz technique.             | Intestinal helminth                       | Parasite | Overall= 217 (52.6%) <i>Toxocara</i> spp., <i>Dipylidium caninum</i> , <i>Ancylostoma caninum</i> , <i>Taenia</i> spp. and <i>Trichuris vulpis</i>                                                                                                                | Medium | [232] |
| 2010 | Survey of thermophilic <i>Campylobacter</i> Species In cats and dogs in north-western Nigeria                  | North-western Nigeria (Sokoto state?) | Random sampling          | 141 dogs Faecal swabs (104 cats). Males= 87; females= 54                            | young (≤12 months) and adult (>12 months)                        | Bacteriological method (culture) | Thermophilic <i>Campylobacter</i> species | Bacteria | Overall= 39 (27.7%) <i>C upsaliensis</i> = 74.4% <i>C jejuni</i> = 23.1%                                                                                                                                                                                          | Good   | [95]  |
| 2010 | Ticks infestation of domestic dogs ( <i>canis familiaris lupus</i> ) in Uyo, Akwa Ibom state, Nigeria          | Akwa Ibom                             | not indicated            | Physical examination and picking out from 208 domestic dogs (109 males: 99 females) | from 1 month to 6                                                | Not described                    | tick infestation                          | Parasite | Prevalence = 115 (55.3%); <i>Rhipicephalus sanguineus</i> (30.8%), <i>Dermacentor Andersoni</i> (19.2%), <i>Ixodes scapularis</i> (16.8%), and <i>Haemaphysalis leachii</i> (7.4%). <i>R. sanguineus</i> the commonest tick species collected, (531/1150; 46.2%). | Medium | [233] |
| 2010 | Serosurvey                                                                                                     | Borno                                 | Random                   | 168 dogs                                                                            | 6                                                                | Latex                            | <i>Toxoplasma</i>                         | Para-    | Overall= 42 (25%)                                                                                                                                                                                                                                                 | Good   | [36]  |

|      |                                                                                                                              |               |                        |                                                   |                                            |                                                 |                                               |          |                                                                                                                                                                                                                                                                                                                       |        |       |  |
|------|------------------------------------------------------------------------------------------------------------------------------|---------------|------------------------|---------------------------------------------------|--------------------------------------------|-------------------------------------------------|-----------------------------------------------|----------|-----------------------------------------------------------------------------------------------------------------------------------------------------------------------------------------------------------------------------------------------------------------------------------------------------------------------|--------|-------|--|
|      | for <i>Toxoplasma gondii</i> in dogs in Maiduguri, Borno State, Nigeria                                                      | state         | sampling               | blood samples (females= 108, males=60)            | months - 1 year, >1≤3 years, >3 years      | Agglutination Test (LAT).                       | <i>gondii</i> antibodies                      | site     |                                                                                                                                                                                                                                                                                                                       |        |       |  |
| 2010 | <i>Babesia canis</i> and <i>Babesia rossi</i> co-infection in an untraveled Nigerian dog                                     | Plateau state | Case report            | 1 case study                                      | 6 months old                               | PCR and DNA sequencing                          | <i>Babesia canis</i> and <i>Babesia rossi</i> | Parasite | co-infection with B.canis and B. rossi                                                                                                                                                                                                                                                                                | Good   | [234] |  |
| 2010 | Studies on dog population in Makurdi, Nigeria (ii): a survey of ectoparasite infestation and its public health implications. | Benue state   | not indicated          | 425 dogs (body brushed and hand-picked parasites) | 0-1 year, 2-3, 4-5, 6-7, >8 years          | Microscopically                                 | Ectoparasites                                 | Parasite | Total ectoparasites= 379<br>Ticks = 93.4%, lice= 5.5% and fleas= 1.1%.<br>Ticks= <i>Rhipicephalus</i> species (53.5%), <i>Boophilus</i> (31.4%) and <i>Amblyomma</i> (8.4%).<br>Lice; <i>Linognathus</i> spp (5.5%) and Fleas; <i>Ctenocephalis</i> spp (1.1%)                                                        | Medium | [235] |  |
| 2010 | Prevalence of gastrointestinal parasites in dogs from Umua-hia City of Abia state                                            | Abia state    | cross sectional design | 210 fecal samples from                            | puppies (≤6 months ) and adults (>3 years) | fecal floatation and sedimentation technique    | Gastrointestinal parasites                    | Parasite | <i>Toxocara canis</i> (95%); <i>Uncinaria stenocephala</i> (95%); <i>Dipylidium caninum</i> (90%); <i>Ancylostoma braziliense</i> (90%) <i>Spirocerca lupi</i> (36%); <i>Diphylllobothrium latum</i> (40%); <i>Trogloitrema salmincola</i> (64%); <i>Linguatula serrata</i> (36%) and <i>Filaroides osleri</i> (57%). | Good   | [236] |  |
| 2010 | Tick infestation of dogs in Makurdi metropolis,                                                                              | Benue state   | Random selection       | 130 dogs examined                                 | Not provided                               | stereoscopic observation and standard taxonomic | Ticks                                         | Parasite | Overall= 72 (55.38%) dogs were infested.<br>533 Nymphs and adult ticks were identified with                                                                                                                                                                                                                           | Good   | [237] |  |

|      |                                                                                                      |              |                     |                                                |                                              |                                                                                                          |                            |          |                                                                                                                                                                                                                                                                                                |        |       |
|------|------------------------------------------------------------------------------------------------------|--------------|---------------------|------------------------------------------------|----------------------------------------------|----------------------------------------------------------------------------------------------------------|----------------------------|----------|------------------------------------------------------------------------------------------------------------------------------------------------------------------------------------------------------------------------------------------------------------------------------------------------|--------|-------|
|      | Benue State-Nigeria                                                                                  |              |                     |                                                |                                              | key                                                                                                      |                            |          | distribution as follows: <i>Rhipicephalus sanguineus</i> = 429 (80.5%), <i>Boophilus annulatus</i> = 78 (14.6%) and <i>Hyalomma truncatum</i> = 26 (4.9%).                                                                                                                                     |        |       |
| 2010 | Serological Surveillance for Non-Rabies Lyssaviruses among Apparently Healthy Dogs in Zaria, Nigeria | Kaduna state | Convenient sampling | 189 sera samples                               | Not provided                                 | Rapid fluorescent focus inhibition test (RFFIT).                                                         | lyssavirus genotypes       | Virus    | Overall= 6 (3.7%) neutralized the Lagos bat virus, and 2 (1.1%) of these additionally show a neutralizing activity against Mokola virus.                                                                                                                                                       | Good   | [238] |
| 2010 | Prevalence of intestinal protozoan parasites of dogs in Ibadan, south-western Nigeria                | Oyo state    | not indicated       | Fecal samples from 324 dogs                    | ≥ 3 months                                   | Formol-ether concentration method/ modified Ziehl - Neelsen technique/ sodium chloride flotation methods | Protozoan parasites        | Parasite | Overall= 189(58.2%) <i>Entamoeba histolytica</i> , <i>Isospora</i> spp, <i>Sarcocystis</i> spp and <i>Cryptosporidium</i> spp                                                                                                                                                                  | Medium | [239] |
| 2009 | The prevalence and intensity of gastrointestinal parasites of dogs in Ile-Ife, Nigeria               | Osun state   | Random sampling     | 269 dogs faecal samples (male=139, female=130) | 0–6,7–12, 13–18,19–24,25–36,37–48,>48 months | modified Kato–Katz procedure/ Microscopy                                                                 | Gastrointestinal parasites | Parasite | The overall prevalence= 55.0%. Nematodes; <i>Toxocara canis</i> (33.8%), <i>Ancylostoma</i> sp. (34.6%), <i>Toxascaris leonina</i> (3.3 %), <i>Trichuris vulpis</i> (3.7%), and <i>Uncinaria stenocephala</i> (0.7%), Cestodes= <i>Dipylidium caninum</i> (4.1%) and <i>Taenia</i> sp. (1.1%). | Good   | [240] |
| 2009 | <i>Salmonella</i> Typhimurium                                                                        | oyo state    | not indicated       | 458 rectal swabs (                             | Not provided                                 | Bacteriological analysis                                                                                 | <i>Salmonella</i> Typhi-   | Bacteria | Overall= 17 (3.7%) All isolates serotyped as <i>Sal-</i>                                                                                                                                                                                                                                       | Medium | [241] |

|      |                                                                                                                        |                        |                                  |                                                                            |                                           |                                                                                                                      |                                  |           |                                                                                                                                                                                                                    |      |       |
|------|------------------------------------------------------------------------------------------------------------------------|------------------------|----------------------------------|----------------------------------------------------------------------------|-------------------------------------------|----------------------------------------------------------------------------------------------------------------------|----------------------------------|-----------|--------------------------------------------------------------------------------------------------------------------------------------------------------------------------------------------------------------------|------|-------|
|      | um infection in diarrhoeic and non-diarrhoeic dogs in Ibadan, Nigeria                                                  |                        |                                  | diarrhoeic =126; and non-diarrhoeic = 332 dogs)                            | vided                                     |                                                                                                                      | murium                           |           | <i>monella</i> Typhimurium.                                                                                                                                                                                        |      |       |
| 2009 | Intestinal Helminthoses in Dogs in Kaduna Metropolis, Kaduna State, Nigeria                                            | Kaduna state           | Cross sectional study            | 160 gastrointestinal tracts of dogs killed for meat (male= 90, female= 70) | NA                                        | Microscopy                                                                                                           | Intestinal Helminthes            | Para-site | Overall= 93.8% Cestodes: <i>Dipylidium caninum</i> (75.0%), <i>Taenia hydatigena</i> (43.8%), <i>Diphyllobothrium latum</i> (6.3%), Nematodes; <i>Ancylostoma caninum</i> (6.3%) and <i>Toxocara canis</i> (6.3%). | Good | [242] |
| 2009 | Berenil-resistant <i>Trypanosoma brucei brucei</i> infection in dog in Nsukka area of Enugu State, Nigeria             | Enugu state            | NA (case report)                 | 1 dog blood sample (female)                                                | 13 months                                 | Giemsa-stained thin blood film/haematocrit centrifugation and animal inoculation techniques                          | <i>Trypanosoma brucei brucei</i> | Para-site | <i>Trypanosoma brucei brucei</i> which was berenil-resistant                                                                                                                                                       | Good | [243] |
| 2009 | Seroprevalence of Leptospiral serovars other than Canicola and Icterohaemorrhagiae in dogs in the Southwestern Nigeria | Oyo/Lagos/Kwara states | A prospective serological survey | 52 blood/urine dog (male=37, female=15)                                    | 12-36 months ,10-30 months , 12-25 months | improved microtechnique for the leptospiral MAT/microscopic sediment examination was done on a dark field microscope | <i>Leptospira</i>                | Bacteria  | Highest Grippotyphosa antibody= 11 (64.7%) Mixed serovars of Grippotyphosa, Bratislava and Pomona = 27 (52.0%)                                                                                                     | Good | [244] |
| 2008 | Ectoparasites of Domestic Dogs in Some Ijebu                                                                           | Ogun state             | not indicated                    | 202 dogs (males=90, females=112)                                           | Not provided                              | Not fully described                                                                                                  | Ectoparasites                    | Para-site | Over all= 199(98.5%). <i>Rhipicephalus sanguineus</i> = 89.6%, <i>Haemophysalis leachii</i> = 78.7%, <i>Ctenocephalides</i>                                                                                        | Poor | [245] |

|      |                                                                                                                                           |                |                    |                                                                                                                                   |                                                                        |                                                 |                                                |               |                                                                                                                                                                                                                                                                                                                                                                                                                                                                                                                                                                                     |        |       |
|------|-------------------------------------------------------------------------------------------------------------------------------------------|----------------|--------------------|-----------------------------------------------------------------------------------------------------------------------------------|------------------------------------------------------------------------|-------------------------------------------------|------------------------------------------------|---------------|-------------------------------------------------------------------------------------------------------------------------------------------------------------------------------------------------------------------------------------------------------------------------------------------------------------------------------------------------------------------------------------------------------------------------------------------------------------------------------------------------------------------------------------------------------------------------------------|--------|-------|
|      | Communi-<br>ties, South-<br>west Nigeria                                                                                                  |                |                    |                                                                                                                                   |                                                                        |                                                 |                                                |               | <i>canis</i> = 13.4% and <i>Damalina</i><br>sp. =1.5%.<br><i>R. sanguineus</i> =abundant<br>species (848/1358, )                                                                                                                                                                                                                                                                                                                                                                                                                                                                    |        |       |
| 2008 | Survey of<br>intestinal<br>helminth<br>parasites of<br>puppies in<br>Ile-Ife,Nigeri<br>a                                                  | Osun<br>state  | NA                 | 50 Puppies<br>(25 males<br>and 25<br>females)                                                                                     | all <18<br>weeks                                                       | postmortem<br>technique                         | Helminth<br>parasites                          | Para-<br>site | Overall= 42 (84%)<br><i>Toxocara canis</i> (80%), <i>Ancy-<br/>lostoma caninum</i> (70%),<br><i>Dipylidium caninum</i> (12%)<br>and <i>Spirocerca lupi</i> (2%).                                                                                                                                                                                                                                                                                                                                                                                                                    | Medium | [246] |
| 2008 | Epidemiolo-<br>gy of intesti-<br>nal helminth<br>parasites of<br>dogs in Iba-<br>dan, Nigeria                                             | Oyo state      | not indi-<br>cated | Fecal sam-<br>ples col-<br>lected from<br>959 dogs.<br>(males=<br>493, and<br>female=<br>466)                                     | 0-6,<br>7-12,<br>13-18,<br>19-24,<br>25-36,<br>37-48,<br>>48<br>months | Modified<br>Kato–Katz<br>technique              | Helminth<br>parasites                          | Para-<br>site | Overall= 237 (24.7%)<br><i>Toxocara canis</i> 9.0%, <i>Ancy-<br/>lostoma spp.</i> 17.9%, <i>Toxasca-<br/>ris leonina</i> 0.6%, <i>Trichuris<br/>vulpis</i> 0.5%, <i>Uncinaria sten-<br/>ocephala</i> 0.4% and <i>Dipylid-<br/>ium caninum</i> 0.2%. Single<br>parasite infections= 85.7%<br>Mixed infections 3.5%.                                                                                                                                                                                                                                                                  | Medium | [67]  |
| 2008 | Parasites of<br>importance<br>for human<br>health in<br>Nigerian<br>dogs: high<br>prevalence<br>and limited<br>knowledge of<br>pet owners | Kwara<br>state | Random<br>sampling | ectopara-<br>sites<br>screening<br>and fecal<br>samples of<br>396 dogs<br>(180<br>(45.5%)<br>males and<br>216 (54.5%)<br>females) | 0–6,<br>7–11, ≥<br>12<br>months                                        | Kato-Katz<br>tech-<br>nique/light<br>microscopy | parasites<br>with zoon-<br>otic poten-<br>tial | Para-<br>site | Overall prevalence = ecto-<br>parasites (60.4%), intestinal<br>helminths (68.4%)<br>fleas ( <i>Ctenocephalides canis</i> ,<br><i>Pulex irritans</i> , <i>Tunga pene-<br/>trans</i> ), mites ( <i>Demodex canis</i> ,<br><i>Otodectes</i> sp., <i>Sarcoptes<br/>scabiei</i> var. <i>canis</i> ), ticks<br>( <i>Rhipicephalus sanguineus</i> ,<br><i>Ixodes</i> sp.), and lice ( <i>Tricho-<br/>dectes canis</i> );<br><i>Toxocara canis</i> , <i>Ancylostoma</i><br>sp., <i>Trichuris vulpis</i> ,<br><i>Dipylidium caninum</i> , <i>Taeni-<br/>dae</i> and <i>Strongyloides</i> sp. | Good   | [247] |
| 2008 | Epidemiolo-<br>gical stud-<br>ies of the<br>incidence of                                                                                  | Lagos<br>state | not indi-<br>cated | Rectal<br>swab from<br>200 ani-<br>mals (pup-                                                                                     | Pup-<br>pies                                                           | Culture/<br>Biochemical<br>tests                | <i>Campylo-<br/>bacter</i> spp                 | Bac-<br>teria | Pig, 2 (7.1%); chicken, 7<br>(25%); sheep, 2 (7.1%);<br>puppies, 0 (0.0%), and<br>guinea                                                                                                                                                                                                                                                                                                                                                                                                                                                                                            | Medium | [248] |



|      |                                                                                                                         |               |                  |                                                          |                                    |                                                                                                              |                                             |          |                                                                                                                                                                                                                                                                                                                                                                                                                                                                                                                                                                          |        |       |
|------|-------------------------------------------------------------------------------------------------------------------------|---------------|------------------|----------------------------------------------------------|------------------------------------|--------------------------------------------------------------------------------------------------------------|---------------------------------------------|----------|--------------------------------------------------------------------------------------------------------------------------------------------------------------------------------------------------------------------------------------------------------------------------------------------------------------------------------------------------------------------------------------------------------------------------------------------------------------------------------------------------------------------------------------------------------------------------|--------|-------|
|      | pathogenic <i>Campylobacter</i> spp. amongst animals in Lagos metropolis                                                |               |                  | pies= 20 among other animals)                            |                                    |                                                                                                              |                                             |          | fowl, 17 (60.7).                                                                                                                                                                                                                                                                                                                                                                                                                                                                                                                                                         |        |       |
| 2008 | Presence and pattern of isolation of zoonotic bacteria in oral cavities of dogs in peri-urban areas of Makurdi, Nigeria | Benue state   | Random sampling  | Oral swabs from 213 local dogs. 80 males and 133 females | 1 month and above                  | Culture/ Biochemical tests                                                                                   | Bacterial pathogens                         | Bacteria | Overall= 160 (75.1%)<br>Multiple= 153 (95.6%)<br>Total isolates =448<br><i>E. coli</i> , 110 (51.6%), <i>Staph. aureus</i> , 93 (46.0%), <i>Proteus mirabilis</i> , 56(26.3), <i>Enterobacter aerogenes</i> , 44 (20.7%), <i>Corynebacterium renale</i> , 42 (19.7%), <i>Klebsiella pneumoniae</i> , 25 (11.7%), <i>Enterococcus faecalis</i> , 17 (8.0), <i>Listeria monocytogenes</i> , 16 (7.5%), <i>Pseudomonas aeruginosa</i> , 16 (7.5%), <i>Streptococcus canis</i> , 13 (6.1%), <i>Bacillus cereus</i> , 13 (6.1%), and <i>Pasteurella multocida</i> , 3 (1.4%). | Medium | [249] |
| 2007 | Environmental surveillance of canine babesiosis as an early alert system on emerging human babesiosis                   | Anambra state | Random selection | 190 dogs (sera). males= 116, females= 74                 | ≤11,12-23,24-35, 36-47, ≥48 months | Microscopy (thick blood films stained with Giemsa solution and thin blood films stained with Leishman stain) | <i>Babesia canis</i>                        | Parasite | All were infested with varying numbers of the dog tick, <i>Rhipicephalus sanguineus</i> (Acari: Ixodidae). Overall prevalence canine babesiosis = 102 (53.7%): Asymptomatic carrier= 55 (53.9%).                                                                                                                                                                                                                                                                                                                                                                         | Good   | [250] |
| 2007 | Epidemiological survey of canine babesiosis in Makurdi,                                                                 | Benue state   | not indicated    | 108 dogs (blood) were screened for Babesia               | Not provided                       | Microscopy                                                                                                   | <i>Babesia canis</i> and their tick vectors | Parasite | <i>Babesia canis</i> = 10.2 %<br>Ticks infestation= 75.9 %<br><i>Rhipicephalus</i> , <i>Boophilus</i> and <i>Amblyomma</i> species                                                                                                                                                                                                                                                                                                                                                                                                                                       | Medium | [251] |

|         |                                                                                                                                                                            |                           |                    |                                                                              |                                                                     |                                                   |                                              |               |                                                                                                                                                       |        |       |
|---------|----------------------------------------------------------------------------------------------------------------------------------------------------------------------------|---------------------------|--------------------|------------------------------------------------------------------------------|---------------------------------------------------------------------|---------------------------------------------------|----------------------------------------------|---------------|-------------------------------------------------------------------------------------------------------------------------------------------------------|--------|-------|
| Nigeria |                                                                                                                                                                            |                           |                    |                                                                              |                                                                     |                                                   |                                              |               |                                                                                                                                                       |        |       |
|         |                                                                                                                                                                            |                           |                    | canis and<br>208 dogs<br>examined<br>for tick                                |                                                                     |                                                   |                                              |               |                                                                                                                                                       |        |       |
| 2007    | Prevalence<br>and intensity<br>of <i>Toxocara<br/>canis</i> (Wer-<br>ner, 1782) in<br>dogs and its<br>potential<br>public health<br>significance<br>in Ile-Ife,<br>Nigeria | Osun<br>state             | not indi-<br>cated | 269 dog<br>faecal sam-<br>ples(male=<br>139, fe-<br>male= 130)               | 0–6,7–<br>12, 13–<br>18,19–<br>24,25–<br>36,37–<br>48,>48<br>months | modified<br>Kato–Katz<br>procedure/<br>Microscopy | <i>Toxocara<br/>canis</i>                    | Para-<br>site | The prevalence = 33.8%.                                                                                                                               | Medium | [252] |
| 2007    | Molecular<br>Survey of<br><i>Babesia canis</i><br>in Dogs in<br>Nigeria                                                                                                    | Not<br>specified          | Random<br>sampling | 400 blood<br>samples<br>(Male=<br>169,Female<br>= 227,No<br>data (ND)<br>=4) | 0–3, 4–<br>7,≥ 8<br>years,<br>ND                                    | Nested PCR<br>and sequence<br>analysis            | <i>Babesia<br/>canis</i>                     | Para-<br>site | Nested PCR = 9 (2.3%).<br>Sequence analysis = 8<br>(2.0%) as <i>B. canis rossi</i> and<br>the 9 <sup>th</sup> (0.3%) as <i>B. canis<br/>vogeli</i> .  | Good   | [39]  |
| 2007    | Antibiotic<br>resistance<br>patterns of<br><i>Escherichia<br/>coli</i> isolates<br>from hu-<br>man,pet,<br>livestock and<br>poultry liv-<br>ing in close<br>contact        | Ogun<br>state             | not indi-<br>cated | 130 faecal<br>samples in<br>total (out of<br>which 20<br>were from<br>dogs)  | NA                                                                  | Culture/<br>Biochemical<br>tests                  | <i>Escherichia<br/>coli</i>                  | Bac-<br>teria | 40(32.3%) Of all, human<br>(92.3%) and dogs (58.3%)<br>showed resistance to co-<br>trimoxazole.<br>More than 58.3% resistance<br>to other antibiotics | Medium | [253] |
| 2007    | Seropreva-<br>lence of an-<br>tibodies to<br><i>Toxoplasma<br/>gondii</i> in<br>some food                                                                                  | Oyo and<br>Lagos<br>state | not indi-<br>cated | 820 dogs<br>blood sam-<br>ples<br>(among<br>other food<br>and com-           | 2-4.5<br>years                                                      | modified<br>agglutination<br>test (MAT)           | <i>Toxoplasma<br/>gondii</i> an-<br>tibodies | Para-<br>site | Overall= , 35.0 %                                                                                                                                     | Medium | [254] |

|      | and companion animals in the Southwestern Nigeria                                                                                     |                                                |               | panion animal)                                                                                                                                                                          |              |                                                                                 |                                 |          |                                                                                                                                                                                                                                                                                                                                      |        |       |  |
|------|---------------------------------------------------------------------------------------------------------------------------------------|------------------------------------------------|---------------|-----------------------------------------------------------------------------------------------------------------------------------------------------------------------------------------|--------------|---------------------------------------------------------------------------------|---------------------------------|----------|--------------------------------------------------------------------------------------------------------------------------------------------------------------------------------------------------------------------------------------------------------------------------------------------------------------------------------------|--------|-------|--|
| 2007 | Parasitology and urban livestock farming in Nigeria: Prevalence of ova in faecal and soil samples and animal ectoparasites in Makurdi | Benue state                                    | not indicated | 150 soil samples, 180 fecal samples (cattle 41, sheep 45, goats 53, dogs 41), Ectoparasites collected from 221 domestic animals viz; 44 dogs, 45 goats, 45 sheep, 44 pigs and 43 cattle | Not provided | Test tube flotation technique/Microscopy/hand-picking and body brushing methods | Parasites                       | Parasite | Overall= 107 (59.4 %) From dogs; <i>Toxocara canis</i> = 23(56.1%), with <i>Trichuris</i> spp= 1(2.4%). Ectoparasites = 1908 (Ticks: 32.80 %; lice: 22.43 %; fleas: 22.06%and mites: 22.69 %). Ticks: <i>Amblyomma</i> (40.10%), while <i>Linognathus</i> (43.90 %), <i>Ctenocephalides</i> (97.38 %) and <i>Sarcoptes</i> (58.89 %) | Medium | [255] |  |
| 2007 | A case of Craniothoracopagus ( <i>monocephalus thoracopagus tetrabrachius</i> ) in a dog.                                             | Ondo state                                     | Case report   | Physical expression of swellings on 3 pigs, 3 dogs                                                                                                                                      | NA           | Physical examination                                                            | <i>Cordylobia anthropophaga</i> | Parasite | Cordylobia larvae = from 2 out of the 3 dogs, a pig and the boy                                                                                                                                                                                                                                                                      | Medium | [256] |  |
| 2007 | Mokola Virus Antibodies in Humans, Dogs, Cats, Cattle, Sheep, and Goats in                                                            | Oyo, Osun, Ogun, Ondo, Ekiti, and Lagos states | not indicated | blood samples from humans (100), dogs (560), cats (25), sheep (500) and                                                                                                                 | not provided | Enzyme Linked Immunosorbent Assay (ELISA)                                       | Mokola virus                    | Virus    | Positive for Mokola virus antibodies = 59 dogs (10.54%) tested.                                                                                                                                                                                                                                                                      | Medium | [257] |  |

| Nigeria     |                                                                                                                     |              |               |                                                         |                                         |                                                                 |                               |          |                                                                                                                                                                                                                                                                                                                             |        |       |
|-------------|---------------------------------------------------------------------------------------------------------------------|--------------|---------------|---------------------------------------------------------|-----------------------------------------|-----------------------------------------------------------------|-------------------------------|----------|-----------------------------------------------------------------------------------------------------------------------------------------------------------------------------------------------------------------------------------------------------------------------------------------------------------------------------|--------|-------|
| goats (500) |                                                                                                                     |              |               |                                                         |                                         |                                                                 |                               |          |                                                                                                                                                                                                                                                                                                                             |        |       |
| 2006        | Bacteriological examination of normal upper respiratory tract of puppies with particular reference to staphylococci | oyo state    | not indicated | 60 dogs deep nasal swabs                                | not provided                            | Culture/staining/biochemical characteristics                    | <i>Staphylococci</i>          | Bacteria | 106 bacterial isolates; coagulase-negative <i>Staphylococcus epidermidis</i> =8.5%, <i>Staphylococcus intermedius</i> = 9.4%, <i>Bacillus</i> sp= 9.4%. <i>Corynebacterium xerosis</i> = 4.7%, and <i>E. coli</i> = 2.8%.                                                                                                   | Medium | [258] |
| 2005        | Prevalence of Intestinal Helminth Parasites of Dogs in Lagos, Nigeria                                               | Lagos state  | not indicated | Fecal samples from 310 dogs (164 males and 146 females) | < 6 months , 6months -2 years, >2 years | test tube floatation method                                     | Intestinal Helminth parasites | Parasite | Strayed-dogs (77.8%), pet dogs (12.0%). Strayed-dogs = <i>Toxocara canis</i> (47.6%), <i>Ancylostoma caninum</i> (41.9%), <i>Dipylidium caninum</i> (37.9%) and <i>Trichuris vulpis</i> (20.9%). care-receiving dogs: <i>Toxocara canis</i> (5.8%), <i>Ancylostoma caninum</i> (3.2%) and <i>Dipylidium caninum</i> (2.1%). | Medium | [259] |
| 2004        | <i>Brucella Abortus</i> agglutinins in dogs in Zaria, Nigeria                                                       | Kaduna state | not indicated | 200 (males= 99, females= 101)                           | <1, 1-5, >5 years                       | Rose Bengal Plate test(RBPT) and Serum Agglutination Test (SAT) | <i>Brucella abortus</i>       | Bacteria | By RBPT = 43 (21.5%), and by SAT = 15 (7.5%).                                                                                                                                                                                                                                                                               | Medium | [260] |
| 2004        | Aspects of intestinal helminth parasites of dogs in world bank-assisted housing estate, new Owerri, Ni-             | Imo state    | not indicated | 554 faecal specimens (males= 304, females= 250)         | 0-36, ≥37 months                        | Direct and concentration methods                                | Intestinal helminths          | Parasite | Overall= 454 (81.9%) Nemaodes (Hookworm= 22.2%, <i>Strongyloides</i> sp = 12.9%, <i>Toxocara canis</i> = 14.8%, <i>Trichuris vulpis</i> = 15.4%) and 2 Cestodes ( <i>Diphylidium caninum</i> = 15.2% and Taeniid eggs= 19.4% .                                                                                              | Medium | [261] |

| geria |                                                                  |           |               |                                                                                                                            |              |                                 |       |       |                                                                                                                                                                                                                                                                                                                                                                                                                                                                       |        |       |
|-------|------------------------------------------------------------------|-----------|---------------|----------------------------------------------------------------------------------------------------------------------------|--------------|---------------------------------|-------|-------|-----------------------------------------------------------------------------------------------------------------------------------------------------------------------------------------------------------------------------------------------------------------------------------------------------------------------------------------------------------------------------------------------------------------------------------------------------------------------|--------|-------|
| 2002  | Fungi isolated from skins and pens of healthy animals in Nigeria | Oyo state | not indicated | 220 skin scrapings, hair, nail samples and pens'' materials (including cows, sheep, goats, rabbits, pigs and <b>dogs</b> ) | Not provided | Soil plate technique/microscopy | Fungi | Fungi | Fungi =: <i>Chrysosporium</i> spp. which included <i>C. keratinophilum</i> , <i>C. tropicum</i> , <i>C. indicum</i> , <i>C. queenslandicum</i> ; dermatophytes= <i>Microsporum gypseum</i> , <i>Trichophyton rubrum</i> , <i>T. terrestre</i> , <i>T. mentagrophytes</i> and nonkeratinophilic fungi= <i>Aspergillus</i> spp., <i>Penicillium</i> spp. <i>Mucor</i> sp. <i>Fusarium</i> spp., <i>Geotrichum</i> spp., <i>Pithomyces</i> sp. and <i>Alternaria</i> sp. | Medium | [262] |
