# Supplementary material
Source: MDPI journal article supplement (https://www.mdpi.com/2813-0227/3/2/12)
Supplement: s1 [file s1]

Archive with 1 entries (1 files):
- zoonoticdis-2161255-supplementary.pdf
